# Supplementary material for: Chiroptical induction with prism[5]arene alkoxy-homologs
Source: Royal Society of Chemistry journal article supplement (doi:10.1039/d2cc05690a), 2022-01-01
Supplement: d2cc05690a1.pdf [file d2cc05690a1.pdf]

## 1 1 General

### 2 Chemicals and instruments:

3 All commercial reagents and solvents (analytical grade) are used as received. The amino acid derivatives were  
4 synthesized according to the reported procedure<sup>1</sup>. <sup>1</sup>H NMR and <sup>13</sup>C NMR spectra were measured at room temperature  
5 on a Bruker AMX-400 (operating at 400 MHz for <sup>1</sup>H NMR and 101 MHz for <sup>13</sup>C NMR) in CDCl<sub>3</sub> with TMS as the  
6 internal standard. HR MALDI mass spectra were recorded on a Bruker Solarix FT-ICR mass spectrometer equipped  
7 with a 7T magnet. CD spectra and binding constants with CD titration were acquired using J-1500 CD spectrometer.  
8 UV-vis spectra were obtained on a Jasco V-650 UV-vis spectrometer. Fluorescence spectra were acquired using a  
9 Fluoromax-4 spectrofluorometer. All the chemicals were obtained from suppliers and used without further  
10 purification in case of analysis investigation.

11 2, 6-Alkoxy naphthalene (2-4), Prism[5]arenes (N1-N3) and 1,4-C-prism[5]arene CN were synthesized following a  
12 literature process<sup>1</sup>.

13

## 14 2 Synthesis of host

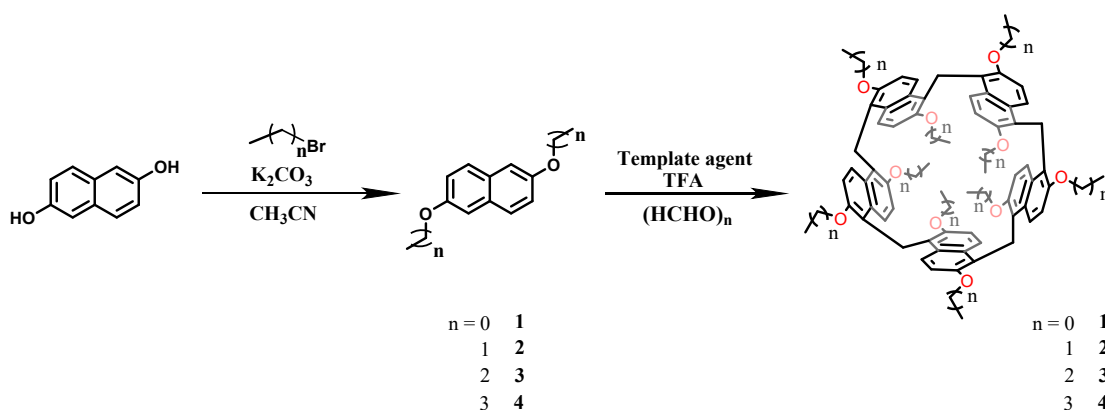

16 **Scheme S1** Synthesis route of hosts.

17

### 18 Synthesis and characterization of **2**:

19 2,6-Naphthol (10 mmol, 1.6 g), K<sub>2</sub>CO<sub>3</sub> (50 mmol, 6.9 g), and iodoethane (80 mmol, 12.5 g) were mixed and refluxed  
20 in acetonitrile (250 mL) under a nitrogen atmosphere for 24h. After cooling, the reaction mixture was filtered and  
21 evaporated by rotary evaporation to give a white solid. The crude product was purified on a silica gel column  
22 (PE/DCM= 1/1, V/V), and the eluent was removed under vacuum to give compound **2** as a white solid (yield: 65%) .

23 <sup>1</sup>H NMR (400 MHz, CDCl<sub>3</sub>) δ 7.64 (d, *J* = 8.7 Hz, 1H), 7.24 – 6.97 (m, 2H), 4.15 (q, *J* = 7.0 Hz, 2H), 1.49 (t, *J* =  
24 7.0 Hz, 3H). <sup>13</sup>C NMR (101 MHz, CDCl<sub>3</sub>) δ 155.37 (s), 129.73 (s), 128.07 (s), 119.18 (s), 106.95 (s), 63.48 (s), 14.89  
25 (s).

26

### 27 Synthesis and characterization of **3**:

28 2,6-Naphthol (10 mmol, 1.6 g), K<sub>2</sub>CO<sub>3</sub> (50 mmol, 6.9 g) and n-Propyl iodide (80 mmol, 13.5 g) were mixed and  
29 refluxed in acetonitrile (250 mL) under a nitrogen atmosphere for 12h. After cooling, the reaction mixture was  
30 filtered and evaporated by rotary evaporation to give a white solid. The crude product was purified on a silica gel  
31 column (PE/DCM= 5/1, V/V), and the eluent was removed under vacuum to give compound **3** as a white solid (yield:  
32 70%). <sup>1</sup>H NMR (400 MHz, CDCl<sub>3</sub>): δ 7.64 (d, *J* = 8.8 Hz, 2H), 7.17 – 7.10 (m, 4H), 4.04 (t, *J* = 6.6 Hz, 4H), 1.89

1 (dd,  $J = 14.1, 6.8$  Hz, 4H), 1.10 (t,  $J = 7.4$  Hz, 6H).  $^{13}\text{C}$  NMR (101 MHz,  $\text{CDCl}_3$ )  $\delta$  155.53 (s), 129.72 (s), 128.02 (s), 119.19 (s), 106.98 (s), 69.59 (s), 22.65 (s), 10.62 (s).

3

4 Synthesis and characterization of **4**:

5 2,6-Naphthol (10 mmol, 1.6 g),  $\text{K}_2\text{CO}_3$  (50 mmol, 6.9 g) and n-butyl bromide (80 mmol, 10.96 g) were mixed and  
6 refluxed in acetonitrile (250 mL) under a nitrogen atmosphere for 12h. After cooling, the reaction mixture was  
7 filtered and evaporated by rotary evaporation to give a white solid. The crude product was purified on a silica gel  
8 column (PE/DCM= 9/1, V/V), and the eluent was removed under vacuum to give compound **4** as a white solid  
9 (yield: 80%).  $^1\text{H}$  NMR (400 MHz,  $\text{CDCl}_3$ ):  $\delta$  7.59 (d,  $J = 8.7$  Hz, 2H), 7.11 – 7.06 (m, 4H), 4.03 (t,  $J = 6.5$  Hz, 4H),  
10 1.84 – 1.77 (m, 4H), 1.51 (dd,  $J = 14.2, 6.7$  Hz, 4H), 0.98 (t,  $J = 7.4$  Hz, 6H).  $^{13}\text{C}$  NMR (101 MHz,  $\text{CDCl}_3$ ):  $\delta$   
11 155.55 (s), 129.71 (s), 128.02 (s), 119.20 (s), 106.95 (s), 67.76 (s), 31.40 (s), 19.36 (s), 13.92 (s).

12

13 Synthesis and characterization of **N1** and **CN**<sup>1a</sup> :

14 2,6-Dimethoxynaphthalene (250 mg, 1.33 mmol), paraformaldehyde (48 mg, 1.60 mmol, 1.2 eq.), and template 1,4-  
15 dihexyl-1,4-diazabicyclo[2.2.2]octane hydroiodide (1.33 mmol, 1.0 eq.) were heated to 70°C in 530 mL dried 1,2-  
16 dichloroethane, and then trifluoroacetic acid (1.5 mL, 0.02 mol, 15 eq.) was added. The solution was stirred at 70  
17 °C for 22 h, and the solvent was removed under reduced pressure. The solid was dissolved in  $\text{CH}_2\text{Cl}_2$  (30 mL) and  
18 washed with a 30 mL  $\text{NaHCO}_3$  saturated aqueous solution. Finally, the organic layer was washed with brine (2 x 20  
19 mL), dried on sodium sulfate, and evaporated under the vacuum to give a light brown solid. The crude product was  
20 purified on a silica gel column (PE/DCM= 1/9, V/V), and the eluent was removed under vacuum to give compound  
21 **N1** (125 mg, yield: 47%) and **CN** (42 mg, yield: 16%) as a white solid.  $^1\text{H}$  NMR (400 MHz,  $\text{CDCl}_3$ ):  $\delta$  8.17 (d,  $J =$   
22 9.4 Hz, 10H), 6.97 (d,  $J = 9.4$  Hz, 10H), 4.73 (s, 10H), 3.76 (s, 30H).

23

24 Synthesis and characterization of **N2**<sup>1b</sup> :

25 2,6-Diethoxynaphthalene (1.00 g, 4.6 mmol), paraformaldehyde (1.2 eq.), and template 1,4-dihexyl-1,4-  
26 diazabicyclo[2.2.2]octane hydroiodide (4.6 mmol, 1.0 eq.) were heated to 70°C in 530 mL dried 1,2-  
27 dichloroethane, and then trifluoroacetic acid (15 eq.) was added. The solution was stirred at 70°C for 22 h, and the  
28 solvent was removed under reduced pressure. The solid was dissolved in  $\text{CH}_2\text{Cl}_2$  (30 mL) and washed with a 30  
29 mL  $\text{NaHCO}_3$  saturated aqueous solution. Finally, the organic layer was washed with brine (2 x 20 mL), dried on  
30 sodium sulfate, and evaporated under the vacuum to give a light brown solid. The crude product was purified on a  
31 silica gel column (PE/toluene/DCM= 1/2/7, V/V/V), and the eluent was removed under vacuum to give compound  
32 **N2** as a white solid (110 mg, yield: 10%).  $^1\text{H}$  NMR (400 MHz,  $\text{CDCl}_3$ )  $\delta$  7.92 (d,  $J = 9.3$  Hz, 10H), 6.83 (d,  $J = 9.4$   
33 Hz, 10H), 4.76 (s, 10H), 3.88 (dd,  $J = 9.3, 7.1$  Hz, 10H), 3.69 (dd,  $J = 15.2, 8.1$  Hz, 10H), 0.96 (t,  $J = 7.0$  Hz, 30H).  
34  $^{13}\text{C}$  NMR (101 MHz,  $\text{CDCl}_3$ )  $\delta$  151.55 (s), 129.57 (s), 124.68 (s), 124.05 (s), 114.47 (s), 65.26 (s), 14.99 (s), 0.08  
35 (s).

36

37 Synthesis and characterization of **N3**<sup>1b</sup> :

38 2,6-Dipropoxynaphthalene (1.00 g, 4.6 mmol), paraformaldehyde (1.2 eq.), and template 1,4-dihexyl-1,4-  
39 diazabicyclo[2.2.2]octane hydroiodide (1.0 eq.) were heated to 70°C in 530 mL dried 1,2-dichloroethane, and then  
40 trifluoroacetic acid (15 eq.) was added. The solution was stirred at 70°C for 22 h, and the solvent was removed  
41 under reduced pressure. The solid was dissolved in  $\text{CH}_2\text{Cl}_2$  (30 mL) and washed with a 30 mL  $\text{NaHCO}_3$  saturated  
42 aqueous solution. Finally, the organic layer was washed with brine (2 x 20 mL), dried on sodium sulfate, and

1 evaporated under the vacuum to give a light brown solid. The crude product was purified on a silica gel column  
2 (PE/toluene/DCM= 2.5/2.5/5, V//V/V), and the eluent was removed under vacuum to give compound **N3** as a white  
3 solid (270 mg, yield: 25%). <sup>1</sup>H NMR (400 MHz, CDCl<sub>3</sub>) δ 8.30 (d, *J* = 9.4 Hz, 1H), 6.93 (d, *J* = 9.4 Hz, 1H),  
4 4.75 (s, 10H), 3.93 (qd, *J* = 6.8, 2.5 Hz, 20H), 1.78 – 1.69 (m, 20H), 1.00 (t, *J* = 7.4 Hz, 30H). <sup>13</sup>C NMR (101  
5 MHz, CDCl<sub>3</sub>) δ 151.42 (s), 130.00 (s), 125.21 (s), 123.70 (s), 114.45 (s), 71.33 (s), 23.13 (s), 10.86 (s).

6

7 Synthesis and characterization of **N4**:

8 2,6-dibutoxynaphthalene (408 mg, 1.5 mmol), paraformaldehyde (54 mg, 1.80 mmol, 1.2 eq.), and template 1,4-  
9 dihexyl-1,4-diazabicyclo[2.2.2]octane hydroiodide (1.5 mmol, 1.0 eq.) were heated to 80°C in 530 mL of dried 1,2-  
10 dichloroethane, and then trifluoroacetic acid (1.5 mL, 0.02 mmol, 15 eq.) was added. The solution was stirred at  
11 80°C for 24 h, and the solvent was removed under reduced pressure. The solid was dissolved in CH<sub>2</sub>Cl<sub>2</sub> (30 mL) and  
12 washed with a 30 mL NaHCO<sub>3</sub> saturated aqueous solution. Finally, the organic layer was washed with brine (2 x 20  
13 mL), dried on sodium sulfate, and evaporated under the vacuum to give a light brown solid. The crude product was  
14 purified on a silica gel column (PE/DCM= 1/3, V/V), and the eluent was removed under vacuum to give 227 mg  
15 white solid (yield: 60%). <sup>1</sup>H NMR (400 MHz, CDCl<sub>3</sub>): δ 8.46 (d, *J* = 9.4 Hz, 1H), 6.96 (d, *J* = 9.5 Hz, 1H), 4.70  
16 (s, 1H), 4.11 – 3.97 (m, 2H), 1.85 (dq, *J* = 13.4, 6.6 Hz, 2H), 1.59 (dt, *J* = 9.9, 4.8 Hz, 2H), 0.99 (t, *J* = 7.4 Hz, 3H).  
17 <sup>13</sup>C NMR (101 MHz, CDCl<sub>3</sub>) δ 151.27 (s), 130.25 (s), 125.41 (s), 123.71 (s), 114.61 (s), 69.50 (s), 31.99 (s), 19.59  
18 (s), 14.02 (s).

19

20 **3 NMR and HRMS spectra**

21

22

23 **Fig. S1** <sup>1</sup>H NMR of **2** in CDCl<sub>3</sub> at 298 K (400 MHz).

24

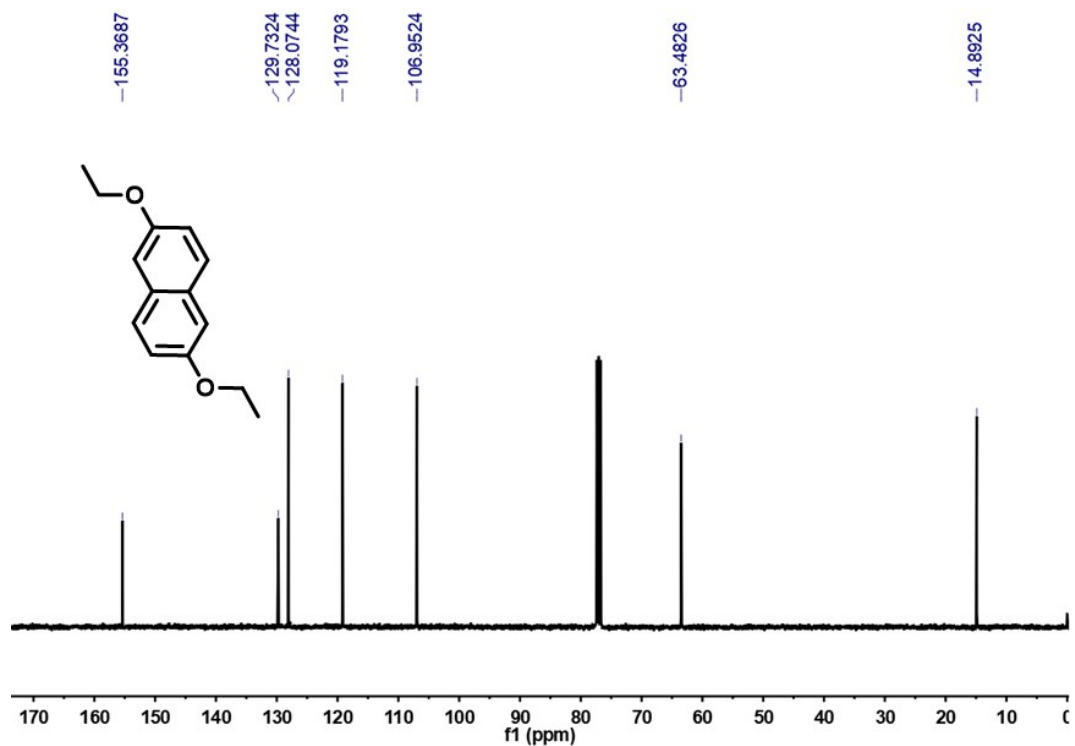

1  
2 Fig. S2 <sup>13</sup>C NMR of 2 in CDCl<sub>3</sub> at 298 K (101 MHz).

3  
4  
5 Fig. S3 <sup>1</sup>H NMR of 3 in CDCl<sub>3</sub> at 298 K (400 MHz).

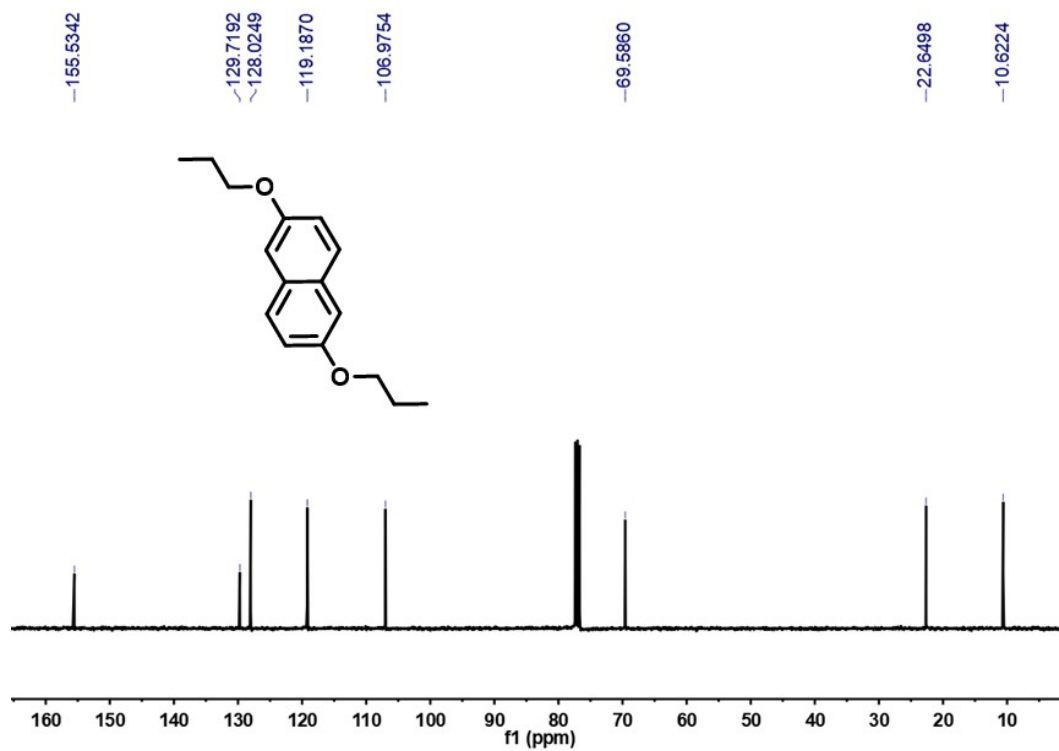

7  
8 Fig. S4 <sup>13</sup>C NMR of 3 in CDCl<sub>3</sub> at 298 K (101 MHz).

1

2

3 Fig. S5  $^1\text{H}$  NMR of **4** in  $\text{CDCl}_3$  at 298 K (400 MHz).

4

5

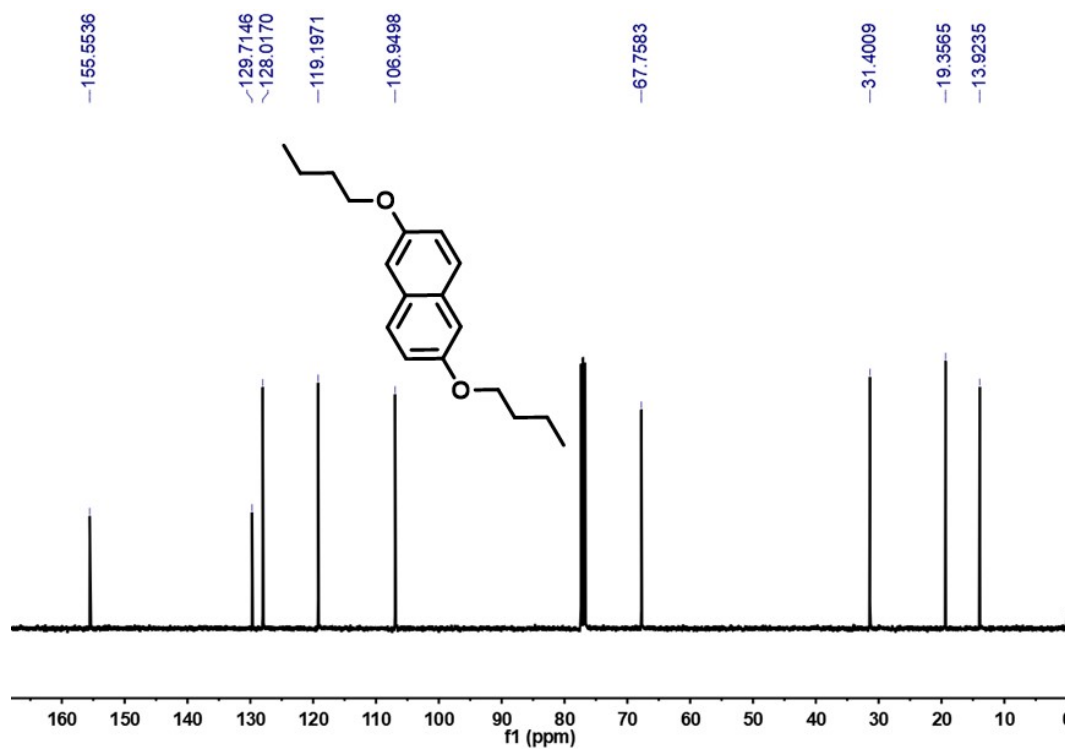

6

7 Fig. S6  $^{13}\text{C}$  NMR of **4** in  $\text{CDCl}_3$  at 298 K (101 MHz).

8

9

10 Fig. S7  $^1\text{H}$  NMR of **N1** in  $\text{CDCl}_3$  at 298 K (400 MHz).

11

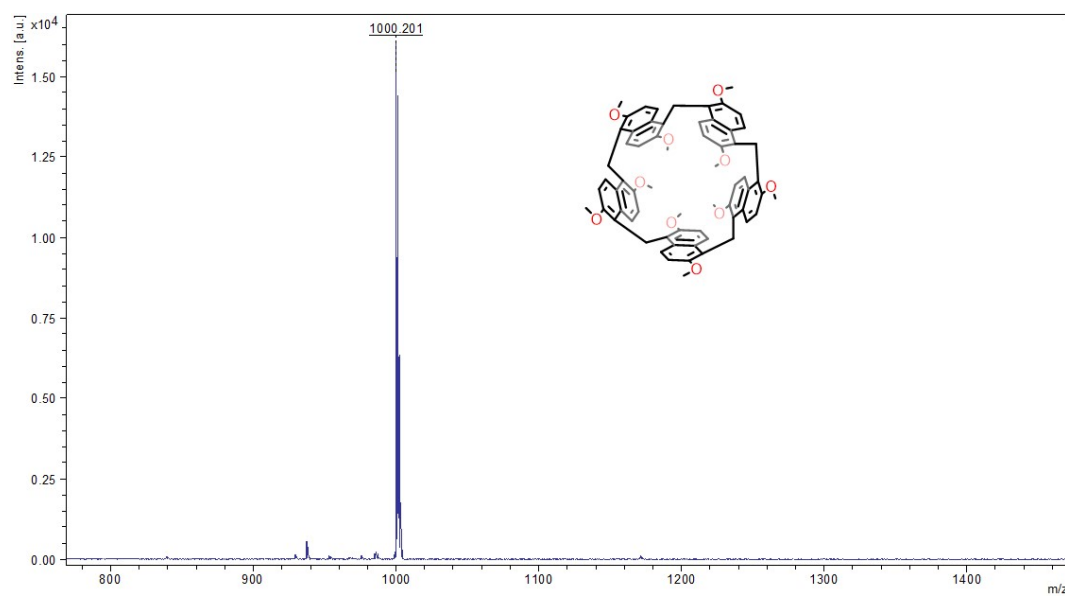

12

1 Fig. S9 MALDI-HRMS spectra of N1.

2

3

4 Fig. S10  $^1\text{H}$  NMR of N2 in  $\text{CDCl}_3$  at 298 K (400 MHz).

5

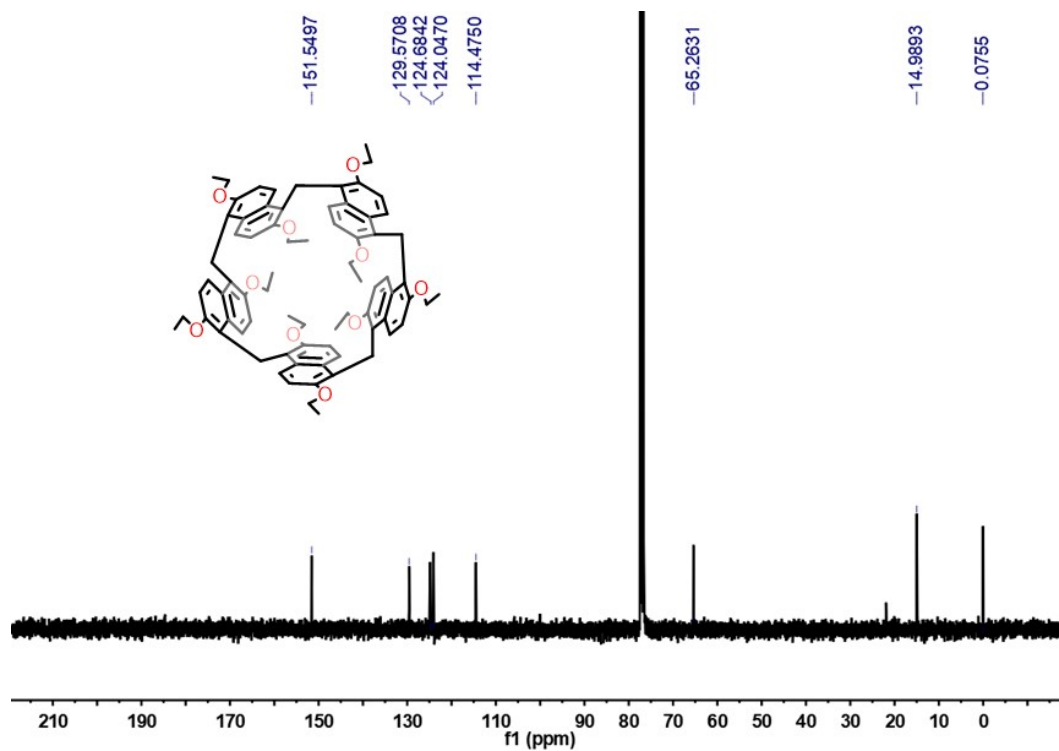

6

7 Fig. S11  $^{13}\text{C}$  NMR of N2 in  $\text{CDCl}_3$  at 298 K (101 MHz).

8

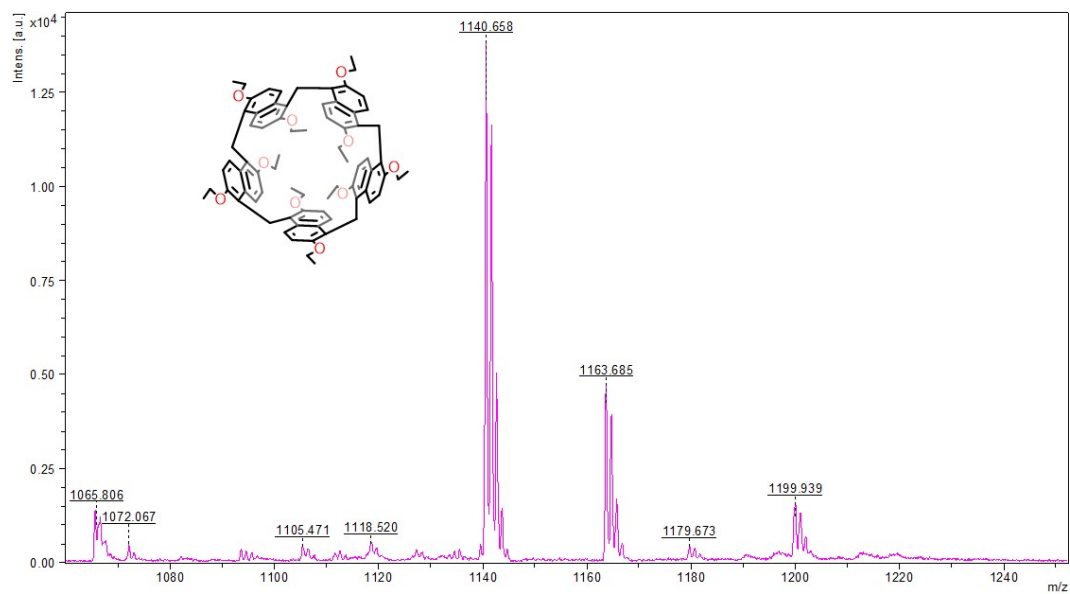

9

10 Fig. S12 MALDI-HRMS spectra of N2.

11

12

13 Fig. S13  $^1\text{H}$  NMR of N3 in  $\text{CDCl}_3$  at 298 K (400 MHz).

1

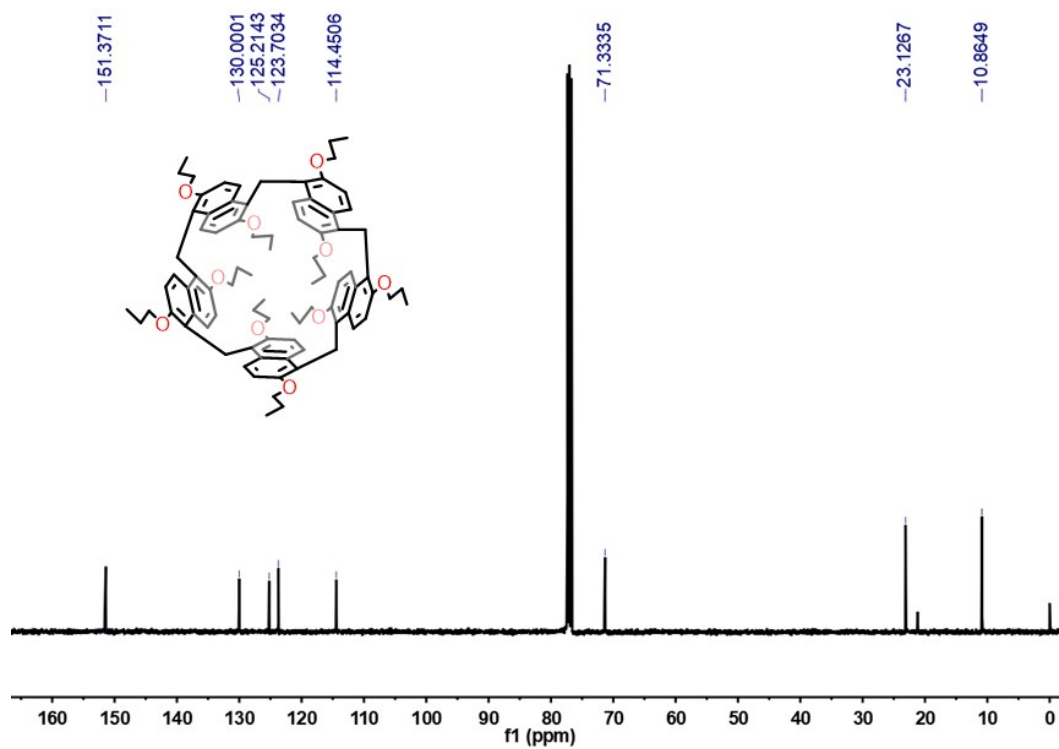

2

3 Fig. S14  $^{13}\text{C}$  NMR of N3 in  $\text{CDCl}_3$  at 298 K (101 MHz).

4

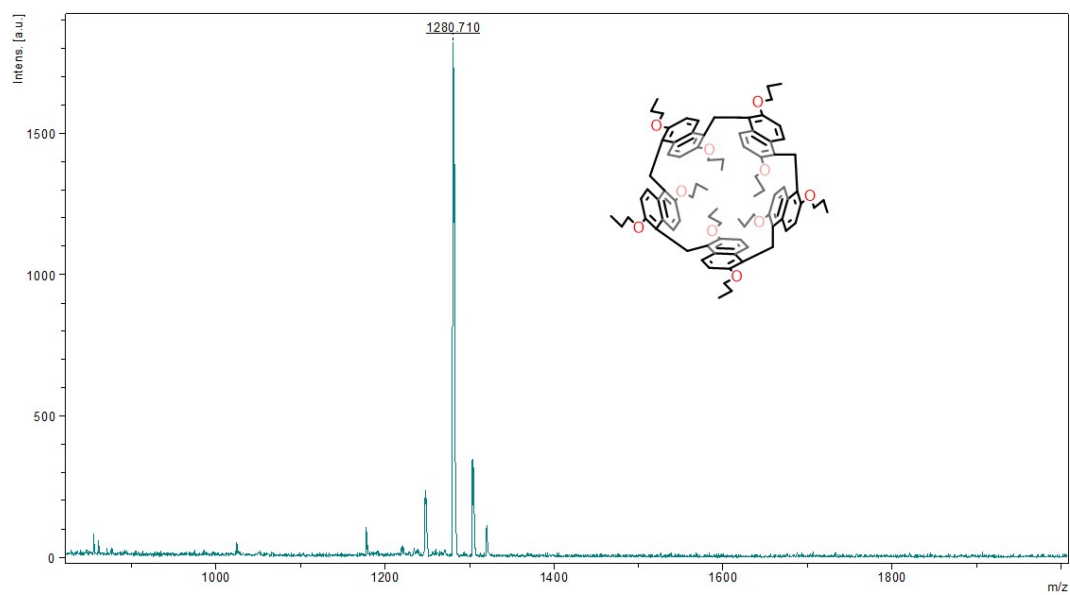

5

6 Fig. S15 MALDI-HRMS spectra of N3.

7

8

9 Fig. S16  $^1\text{H}$  NMR of N4 in  $\text{CDCl}_3$  at 298 K (400 MHz).

10

11

12 Fig. S17  $^{13}\text{C}$  NMR of N4 in  $\text{CDCl}_3$  at 298 K (101 MHz).

13

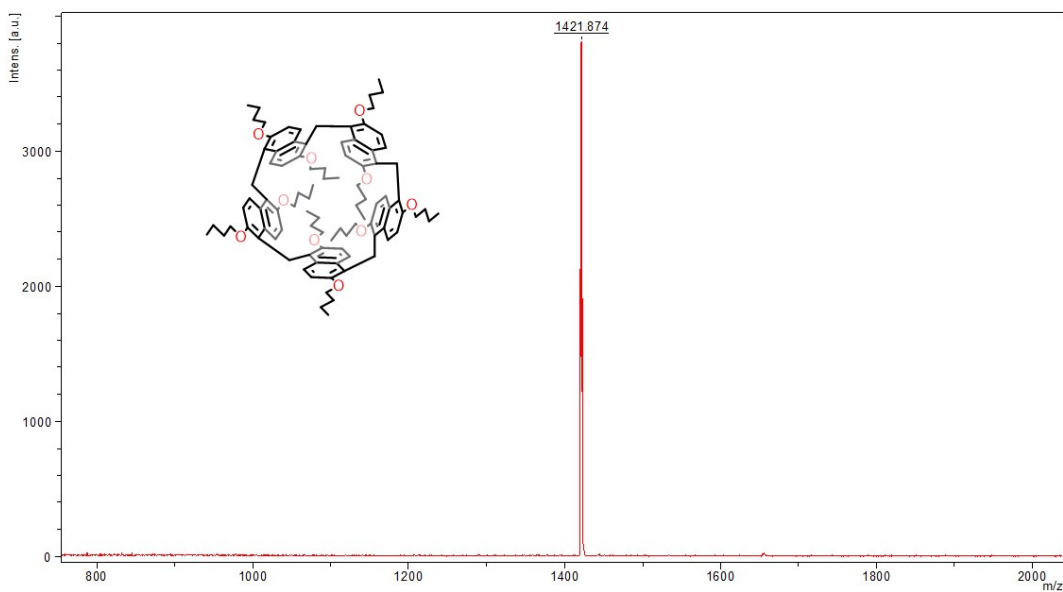

1

2 Fig. S18 MALDI-HRMS spectra of N4.

3

4 4 Spectroscopic properties of prismarene

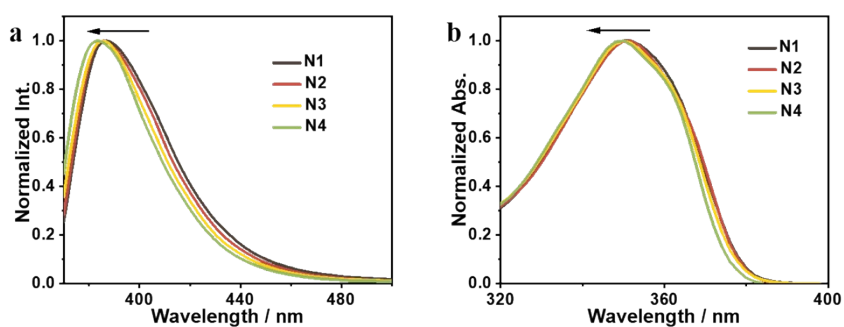

5

6 Fig. S19 Normalized Fluorescence (a) and UV-Vis (b) spectra of N1 ( $\lambda_{\text{Abs}}=351$  nm and  $\lambda_{\text{em}}=386$  nm), N2 ( $\lambda_{\text{Abs}}=350$  nm and  $\lambda_{\text{em}}=386$  nm),

7 N3 ( $\lambda_{\text{Abs}}=349$  nm and  $\lambda_{\text{em}}=385$  nm) and N4 ( $\lambda_{\text{Abs}}=348$  nm and  $\lambda_{\text{em}}=383$  nm) in  $\text{CHCl}_3$  at room temperature.

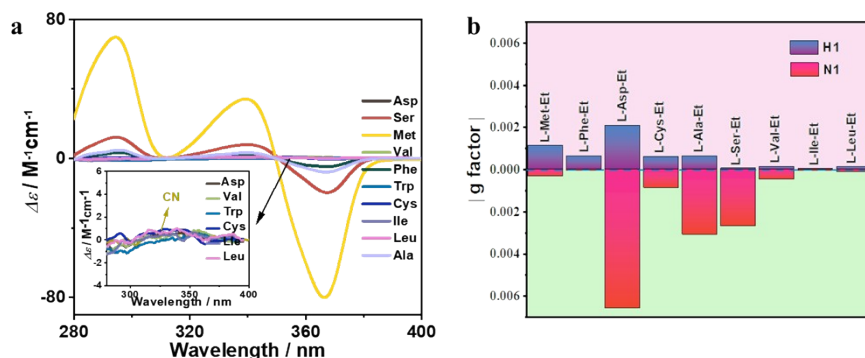

8

9 Fig. S20 (a) CD spectra of CN with different chiral amino in  $\text{CHCl}_3$  at room temperature. (b) Comparison of g factor of CD signals of N1

10 and P1 induced by different amino acids ethyl ester salts. g factor of P1 induced by different amino acids ethyl ester salts reported by Yang

11 et al.<sup>2</sup>



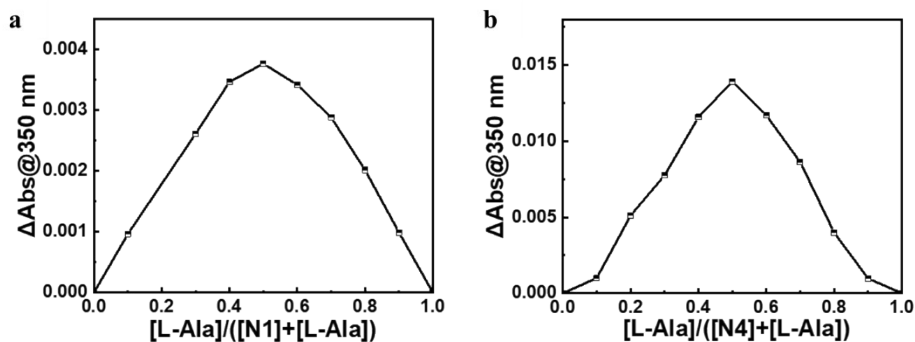

1  
 2 **Fig. S21** Job's plot of the change in the UV-vis absorption spectrum at 350 nm showing the stoichiometry of the complexation of *L-Ala*  
 3 with *N1* or *N4* in  $\text{CHCl}_3$  (rt).  $c_{[G]+[H]} = 5.0 \times 10^{-5}$  M.

4  
 5 **5 Spectroscopic titrations of the host-guest complexation**

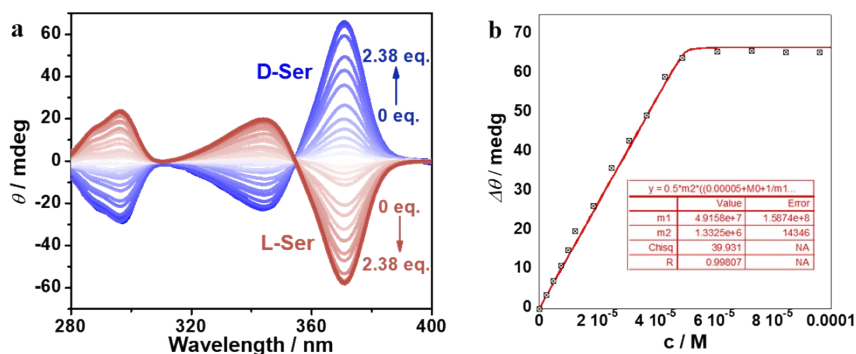

6  
 7 **Fig. S22** (a) CD spectral changes of *N1* ( $5.0 \times 10^{-5}$  M) upon titration with *D/L-Ser* in  $\text{CHCl}_3$  at room temperature. (b) The non-linear curve-  
 8 fitting based on the CD intensity changes at 370 nm upon the addition of *L-Ser*, and the host-guest association constant  $K_a$  was estimated  
 9 to be  $3.1 \times 10^7$   $\text{M}^{-1}$ .

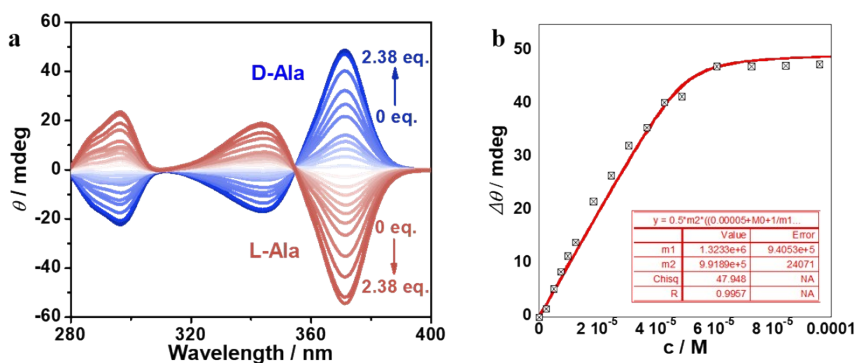

10  
 11 **Fig. S23** (a) CD spectral changes of *N1* ( $5.0 \times 10^{-5}$  M) upon titration with *D/L-Ala* in  $\text{CHCl}_3$  at room temperature. (b) The non-linear  
 12 curve-fitting based on the CD intensity changes at 370 nm upon the addition of *L-Ala*, and the host-guest association constant  $K_a$  was  
 13 estimated to be  $1.3 \times 10^6$   $\text{M}^{-1}$ .

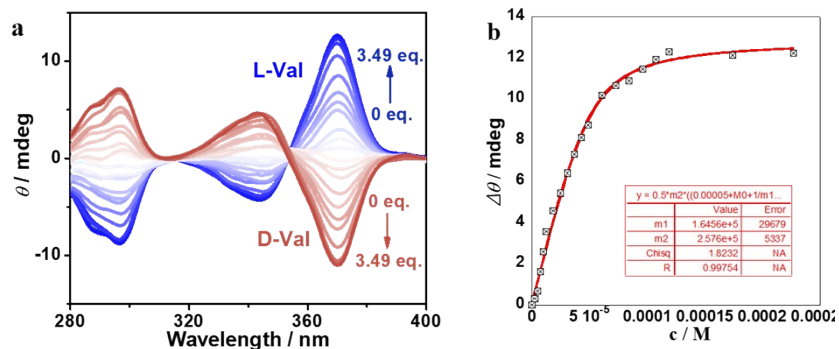

1  
 2 **Fig. S24** (a) CD spectral changes of NI ( $5.0 \times 10^{-5}$  M) upon titration with *D-/L-Val* in  $\text{CHCl}_3$  at room temperature. (b) The non-linear  
 3 curve-fitting based on the CD intensity changes at 370 nm upon the addition of *L-Val*, and the host-guest association constant  $K_a$  was  
 4 estimated to be  $1.6 \times 10^5 \text{ M}^{-1}$ .

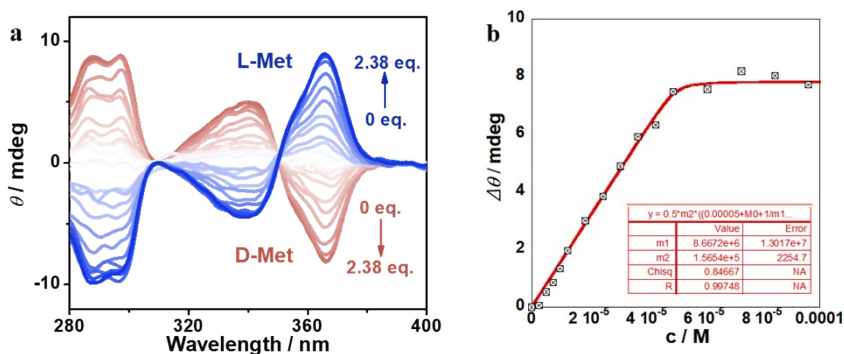

5  
 6 **Fig. S25** (a) CD spectral changes of NI ( $5.0 \times 10^{-5}$  M) upon titration with *D-/L-Met* in  $\text{CHCl}_3$  at room temperature. (b) The non-linear  
 7 curve-fitting based on the CD intensity changes at 370 nm upon the addition of *L-Met*, and the host-guest association constant  $K_a$  was  
 8 estimated to be  $8.7 \times 10^6 \text{ M}^{-1}$ .

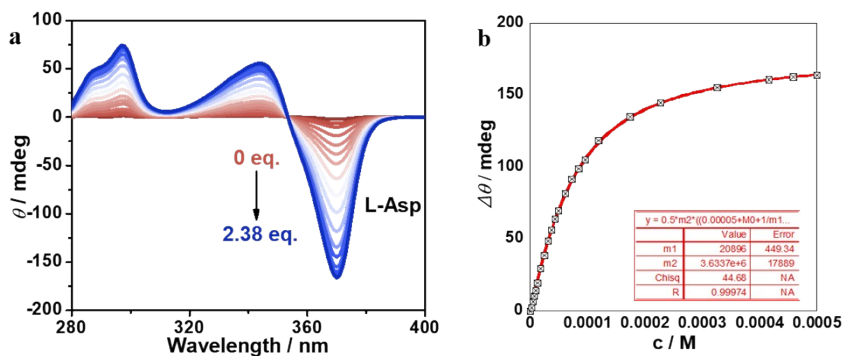

9  
 10 **Fig. S26** (a) CD spectral changes of NI ( $5.0 \times 10^{-5}$  M) upon titration with *L-Asp* in  $\text{CHCl}_3$  at room temperature. (b) The non-linear curve-  
 11 fitting based on the CD intensity changes at 369 nm upon the addition of *L-Asp*, and the host-guest association constant  $K_a$  was estimated  
 12 to be  $2.1 \times 10^4 \text{ M}^{-1}$ .

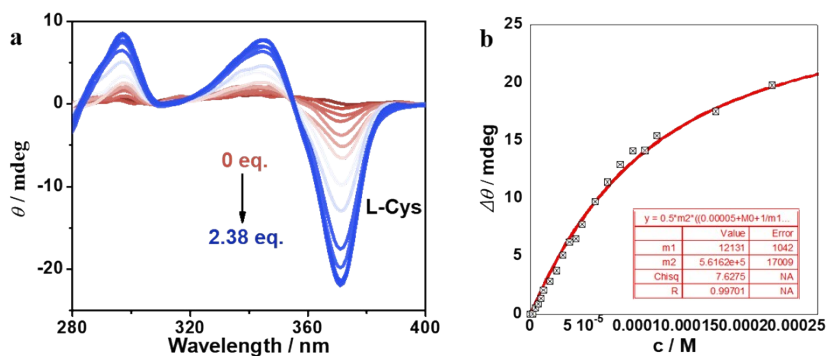

1  
 2 **Fig. S27** (a) CD spectral changes of N1 ( $5.0 \times 10^{-5}$  M) upon titration with *L*-Cys in  $\text{CHCl}_3$  at room temperature. (b) The non-linear curve-  
 3 fitting based on the CD intensity changes at 371 nm upon the addition of *L*-Cys, and the host-guest association constant  $K_a$  was estimated  
 4 to be  $1.2 \times 10^4 \text{ M}^{-1}$ .

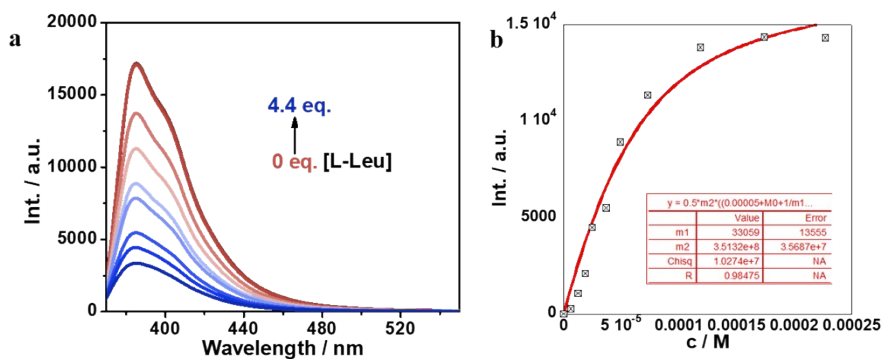

5  
 6 **Fig. S28** Fluorescence spectral changes of N1 ( $5.0 \times 10^{-5}$  M) upon titration with *L*-Leu in  $\text{CHCl}_3$  at room temperature (a). The non-linear  
 7 curve-fitting (Fluorescence titrations) for the complexation of *L*-Leu and N1 in  $\text{CHCl}_3$  at room temperature (b). Curve fitting based on the  
 8 CD intensity changes. The host-guest association constants ( $K_a$ ) was estimated to be  $3.3 \times 10^4 \text{ M}^{-1}$ .

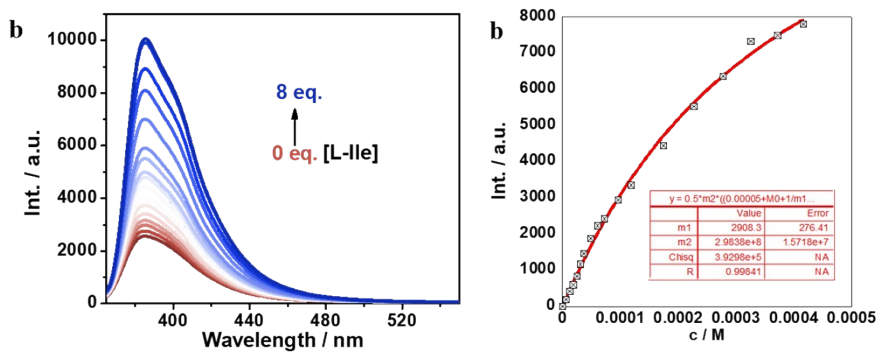

9  
 10 **Fig. S29** Fluorescence spectral changes of N1 ( $5.0 \times 10^{-5}$  M) upon titration with *L*-Ile in  $\text{CHCl}_3$  at room temperature (a). The non-linear  
 11 curve-fitting (Fluorescence titrations) for the complexation of *L*-Ile and N1 in  $\text{CHCl}_3$  at room temperature (b). Curve fitting based on the  
 12 CD intensity changes. The host-guest association constants ( $K_a$ ) was estimated to be  $2.9 \times 10^3 \text{ M}^{-1}$ .

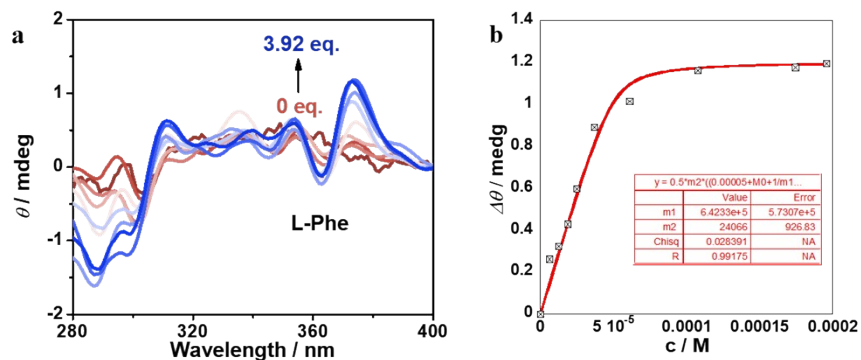

1

2 **Fig. S30** CD spectral changes of N1 ( $5.0 \times 10^{-5}$  M) upon titration with *L*-Phe in  $\text{CHCl}_3$  at room temperature (a). The non-linear curve-fitting  
 3 (CD titrations) for the complexation of *L*-Phe and N1 (371 nm) in  $\text{CHCl}_3$  at room temperature (b). Curve fitting based on the CD intensity  
 4 changes. The host-guest association constants ( $K_a$ ) was estimated to be  $6.4 \times 10^5 \text{ M}^{-1}$ .

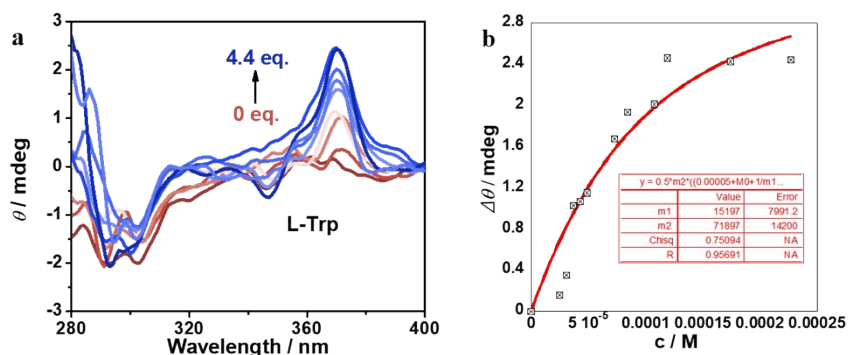

5

6 **Fig. S31** CD spectral changes of N1 ( $5.0 \times 10^{-5}$  M) upon titration with *L*-Trp in  $\text{CHCl}_3$  at room temperature (a). The non-linear curve-  
 7 fitting (CD titrations) for the complexation of *L*-Trp and N1 (371 nm) in  $\text{CHCl}_3$  at room temperature (b). Curve fitting based on the CD  
 8 intensity changes. The host-guest association constants ( $K_a$ ) was estimated to be  $2.1 \times 10^4 \text{ M}^{-1}$ .

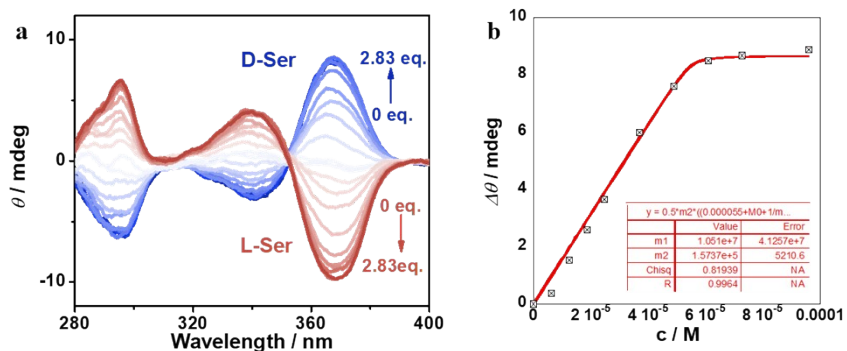

9

10 **Fig. S32** CD spectral changes of N2 ( $5.5 \times 10^{-5}$  M) upon titration with Ser in  $\text{CHCl}_3$  at room temperature (a). The non-linear curve-fitting  
 11 (CD titrations) for the complexation of *L*-Ser and N2 (368 nm) in  $\text{CHCl}_3$  at room temperature (b). Curve fitting based on the CD  
 12 intensity changes. The host-guest association constants ( $K_a$ ) was estimated to be  $1.05 \times 10^7 \text{ M}^{-1}$ .

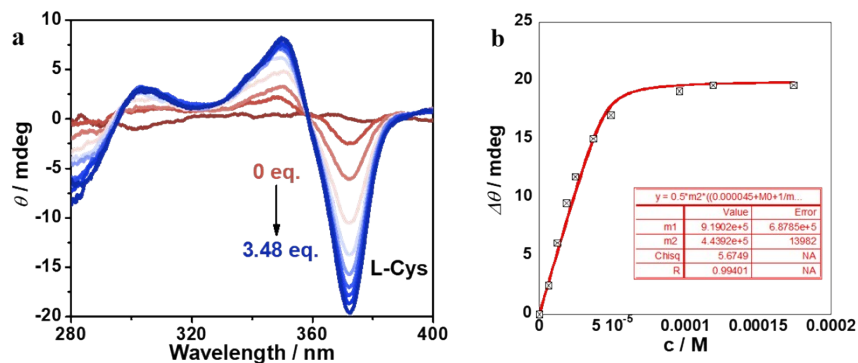

1  
 2 **Fig. S33** CD spectral changes of N2 ( $4.5 \times 10^{-5}$  M) upon titration with *L*-Cys in  $\text{CHCl}_3$  at room temperature (a). The non-linear curve-fitting  
 3 (CD titrations) for the complexation of *L*-Cys and N2 (372 nm) in  $\text{CHCl}_3$  at room temperature (b). The association constants ( $K_a$ ) of host  
 4 and guest is  $9.19 \times 10^5 \text{ M}^{-1}$ .

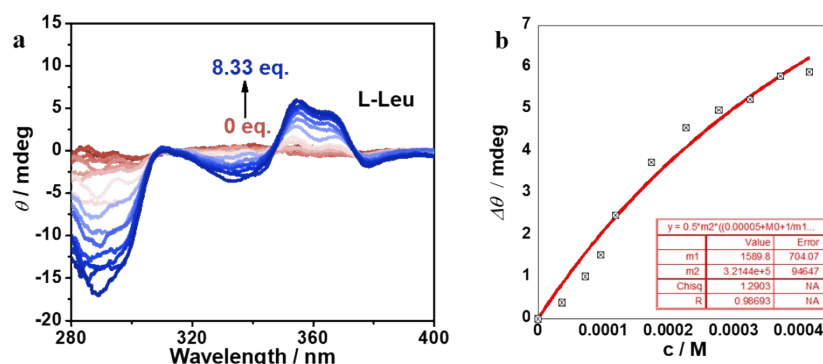

5  
 6 **Fig. S34** CD spectral changes of N2 ( $5.0 \times 10^{-5}$  M) upon titration with *L*-Leu in  $\text{CHCl}_3$  at room temperature (a). The non-linear curve-fitting  
 7 fitting (CD titrations) for the complexation of *L*-Leu and N2 (360 nm) in  $\text{CHCl}_3$  at room temperature (b). The association constants ( $K_a$ ) of  
 8 host and guest is  $1.59 \times 10^3 \text{ M}^{-1}$ .

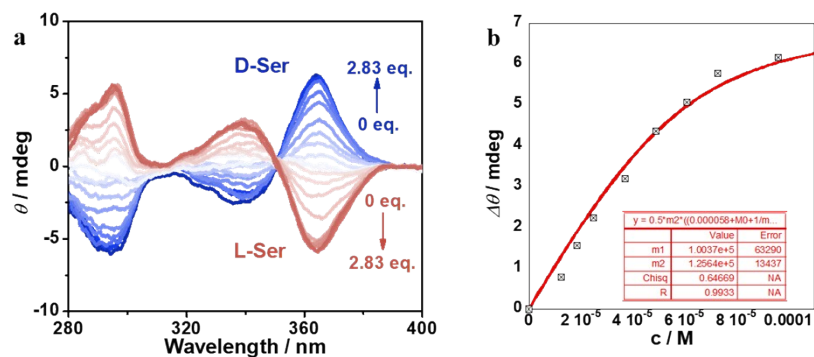

9  
 10 **Fig. S35** CD spectral changes of N3 ( $5.8 \times 10^{-5}$  M) upon titration with Ser in  $\text{CHCl}_3$  at room temperature (a). The non-linear curve-fitting  
 11 (CD titrations) for the complexation of *L*-Ser and N3 (364 nm) in  $\text{CHCl}_3$  at room temperature (b). The association constants ( $K_a$ ) of host  
 12 and guest is  $1.00 \times 10^5 \text{ M}^{-1}$ .

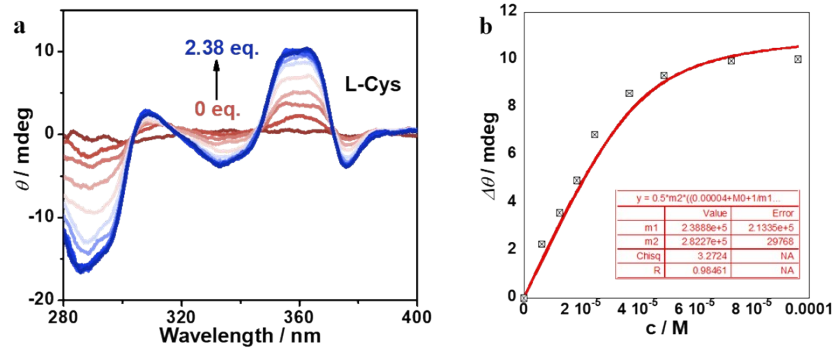

1  
 2 **Fig. S36** CD spectral changes of N3 ( $5.8 \times 10^{-5}$  M) upon titration with *L*-Cys in  $\text{CHCl}_3$  at room temperature (a). The non-linear curve-fitting  
 3 (CD titrations) for the complexation of *L*-Cys and N3 (359 nm) in  $\text{CHCl}_3$  at room temperature (b). The association constants ( $K_a$ ) of host  
 4 and guest is  $2.39 \times 10^5 \text{ M}^{-1}$ .

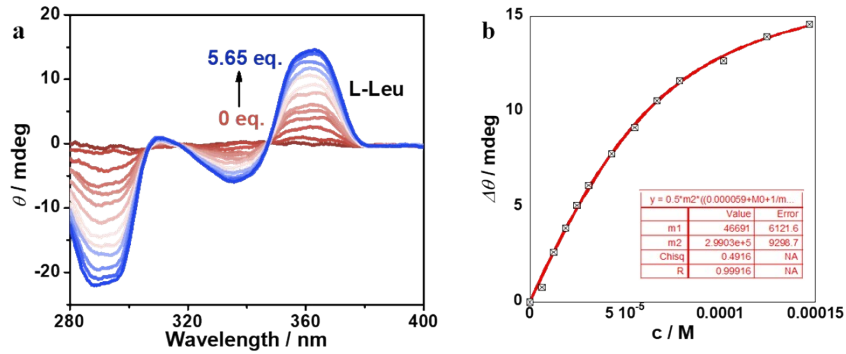

5  
 6 **Fig. S37** CD spectral changes of N3 ( $5.8 \times 10^{-5}$  M) upon titration with *L*-Leu in  $\text{CHCl}_3$  at room temperature (a). The non-linear curve-fitting  
 7 fitting (CD titrations) for the complexation of *L*-Leu and N3 (362 nm) in  $\text{CHCl}_3$  at room temperature (b). The association constants ( $K_a$ ) of  
 8 host and guest is  $4.67 \times 10^4 \text{ M}^{-1}$ .

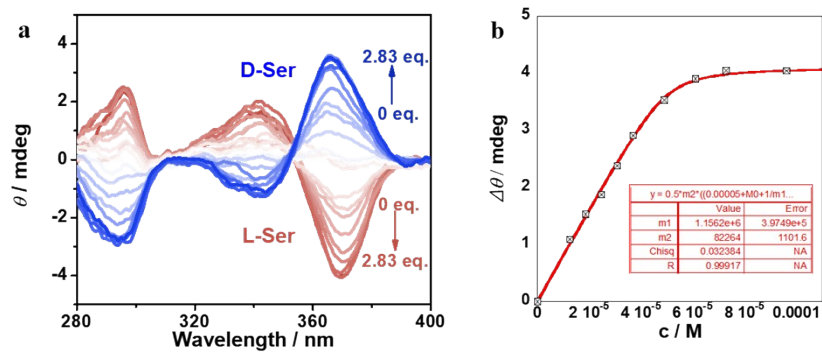

9  
 10 **Fig. S38** CD spectral changes of N4 ( $5.0 \times 10^{-5}$  M) upon titration with Ser in  $\text{CHCl}_3$  at room temperature (a). The non-linear curve-fitting  
 11 (CD titrations) for the complexation of *L*-Ser and N4 (366 nm) in  $\text{CHCl}_3$  at room temperature (b). The association constants ( $K_a$ ) of host  
 12 and guest is  $1.16 \times 10^6 \text{ M}^{-1}$ .

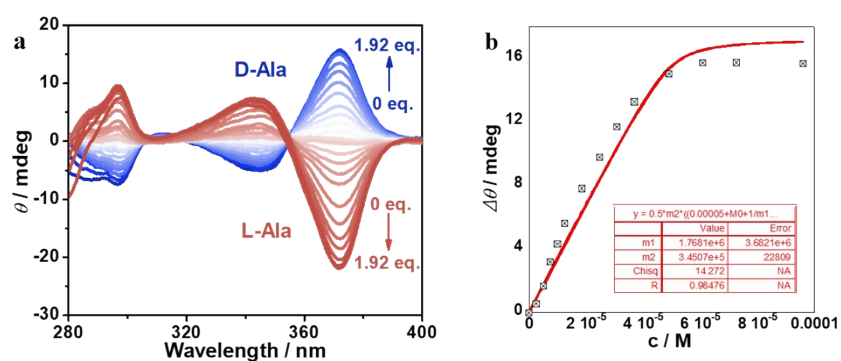

1

2 **Fig. S39** CD spectral changes of **N4** ( $5.0 \times 10^{-5}$  M) upon titration with **Ala** in  $\text{CHCl}_3$  at room temperature (a). The non-linear curve-fitting  
 3 (CD titrations) for the complexation of **L-Ala** and **N4** (368 nm) in  $\text{CHCl}_3$  at room temperature (b). The association constants ( $K_a$ ) of host  
 4 and guest is  $1.77 \times 10^6 \text{ M}^{-1}$ .

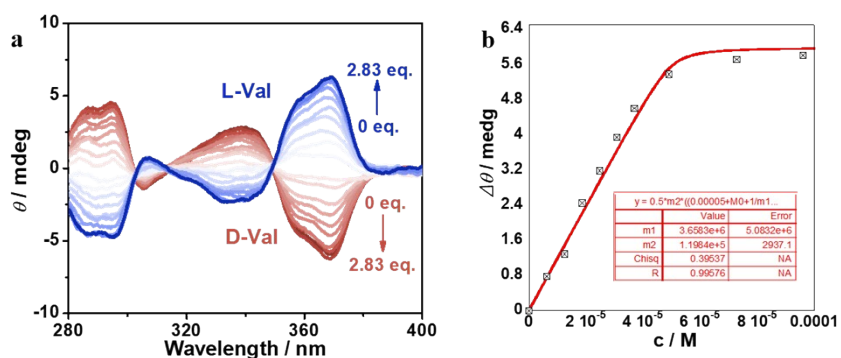

5

6 **Fig. S40** CD spectral changes of **N4** ( $5.0 \times 10^{-5}$  M) upon titration with **Val** in  $\text{CHCl}_3$  at room temperature (a). The non-linear curve-fitting  
 7 (CD titrations) for the complexation of **L-Val** and **N4** (369 nm) in  $\text{CHCl}_3$  at room temperature (b). The association constants ( $K_a$ ) of host  
 8 and guest is  $3.66 \times 10^6 \text{ M}^{-1}$ .

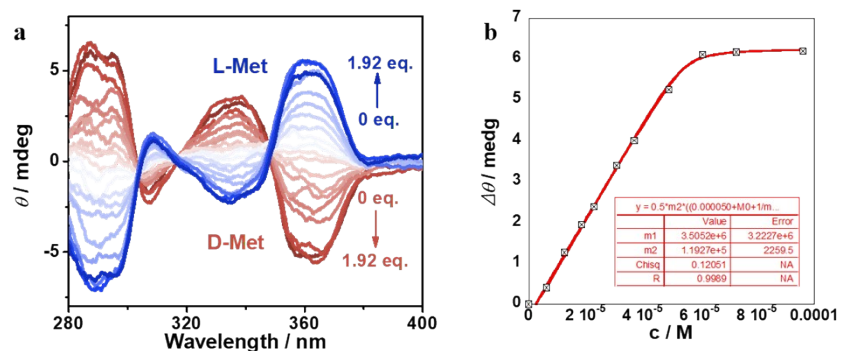

9

10 **Fig. S41** CD spectral changes of **N4** ( $5.0 \times 10^{-5}$  M) upon titration with **Met** in  $\text{CHCl}_3$  at room temperature (a). The non-linear curve-fitting  
 11 (CD titrations) for the complexation of **L-Met** and **N4** (369 nm) in  $\text{CHCl}_3$  at room temperature (b). The association constants ( $K_a$ ) of host  
 12 and guest is  $3.51 \times 10^6 \text{ M}^{-1}$ .

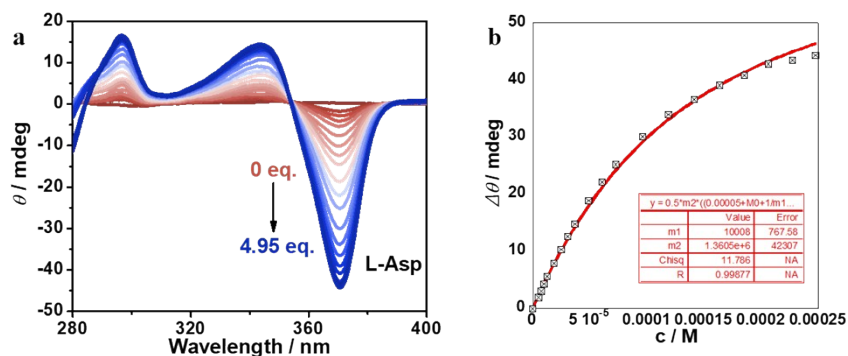

1

2 Fig. S42 CD spectral changes of N4 ( $5.0 \times 10^{-5}$  M) upon titration with *L*-Asp in  $\text{CHCl}_3$  at room temperature (a). The non-linear curve-  
 3 fitting (CD titrations) for the complexation of *L*-Asp and N4 (370 nm) in  $\text{CHCl}_3$  at room temperature (b). The association constants ( $K_a$ ) of  
 4 host and guest is  $1.00 \times 10^4 \text{ M}^{-1}$ .

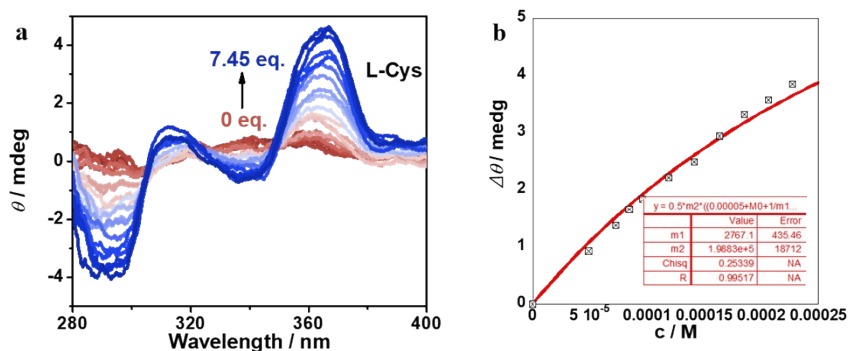

5

6 Fig. S43 CD spectral changes of N4 ( $5.0 \times 10^{-5}$  M) upon titration with *L*-Cys in  $\text{CHCl}_3$  at room temperature (a). The non-linear curve-fitting  
 7 (CD titrations) for the complexation of *L*-Cys and N4 (370 nm) in  $\text{CHCl}_3$  at room temperature (b). The association constants ( $K_a$ ) of host  
 8 and guest is  $2.77 \times 10^3 \text{ M}^{-1}$ .

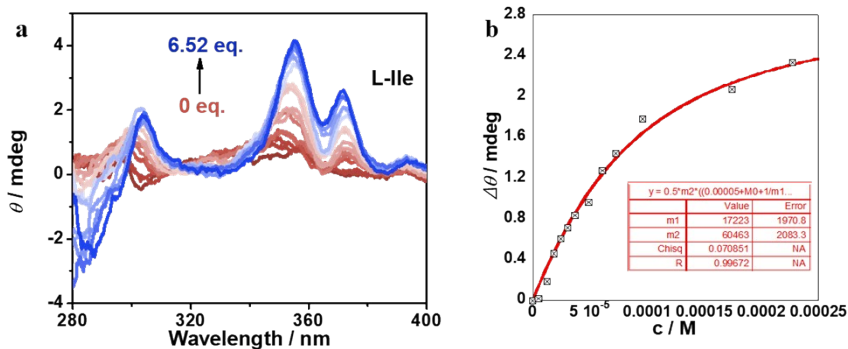

9

10 Fig. S44 CD spectral changes of N4 ( $5.0 \times 10^{-5}$  M) upon titration with *L*-Ile in  $\text{CHCl}_3$  at room temperature (a). The non-linear curve-fitting  
 11 (CD titrations) for the complexation of *L*-Ile and N4 (360 nm) in  $\text{CHCl}_3$  at room temperature (b). The association constants ( $K_a$ ) of host  
 12 and guest is  $1.72 \times 10^4 \text{ M}^{-1}$ .



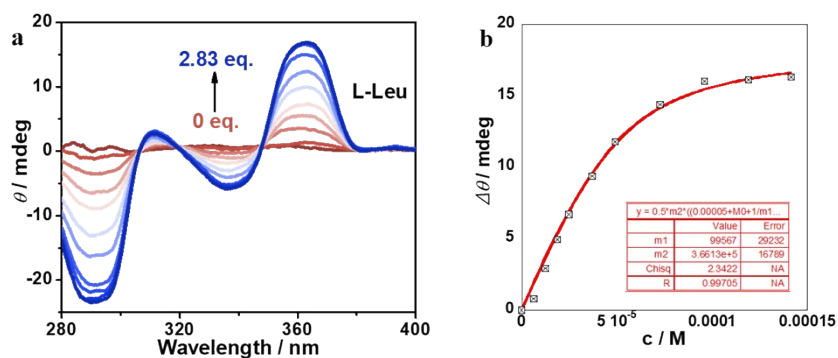

1

2 Fig. S45 CD spectral changes of N4 ( $5.0 \times 10^{-5}$  M) upon titration with *L*-Leu in  $\text{CHCl}_3$  at room temperature (a). The non-linear curve-  
 3 fitting (CD titrations) for the complexation of *L*-Leu and N4 (365 nm) in  $\text{CHCl}_3$  at room temperature (b). The association constants ( $K_a$ ) of  
 4 host and guest is  $9.96 \times 10^4 \text{ M}^{-1}$ .

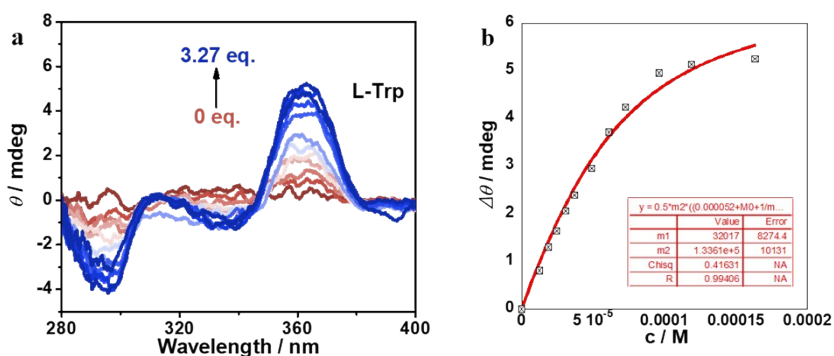

5

6 Fig. S46 CD spectral changes of N4 ( $5.2 \times 10^{-5}$  M) upon titration with *L*-Trp in  $\text{CHCl}_3$  at room temperature (a). The non-linear curve-  
 7 fitting (CD titrations) for the complexation of *L*-Trp and N4 (365 nm) in  $\text{CHCl}_3$  at room temperature (b). The association constants ( $K_a$ ) of  
 8 host and guest is  $3.20 \times 10^4 \text{ M}^{-1}$ .

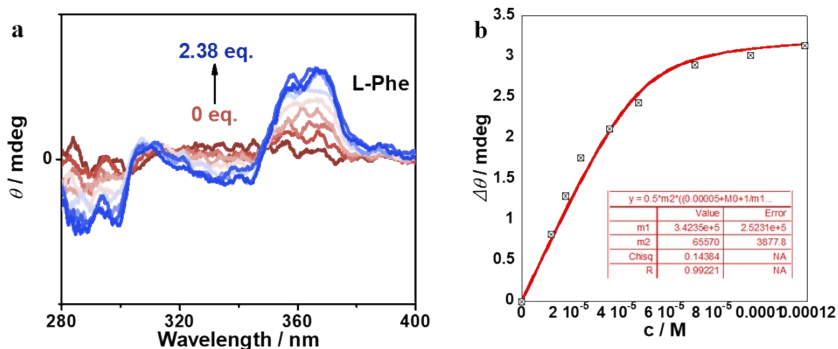

9

10 Fig. S47 CD spectral changes of N4 ( $5.0 \times 10^{-5}$  M) upon titration with *L*-Phe in  $\text{CHCl}_3$  at room temperature (a). The non-linear curve-fitting  
 11 (CD titrations) for the complexation of *L*-Phe and N4 (369 nm) in  $\text{CHCl}_3$  at room temperature (b). The association constants ( $K_a$ ) of host  
 12 and guest is  $3.42 \times 10^5 \text{ M}^{-1}$ .

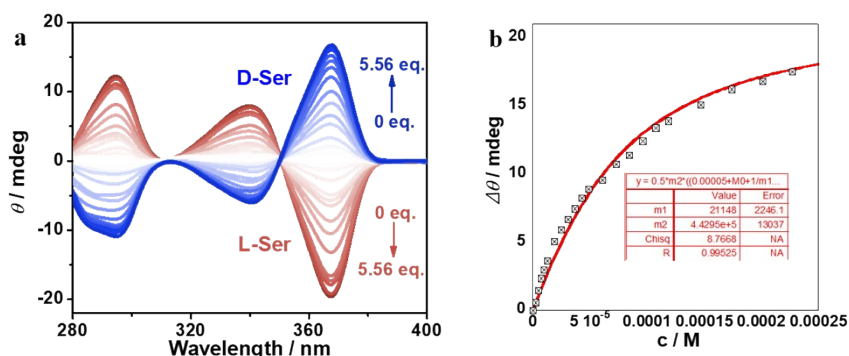

1  
 2 **Fig. S48** (a) CD spectral changes of CN1 ( $5.0 \times 10^{-5}$  M) upon titration with *D*-/*L*-Ser in  $\text{CHCl}_3$  at room temperature. (b) The non-linear  
 3 curve-fitting based on the CD intensity changes at 368 nm upon the addition of *L*-Ser. The host-guest association constant  $K_a$  was estimated  
 4 to be  $2.11 \times 10^4 \text{ M}^{-1}$ .

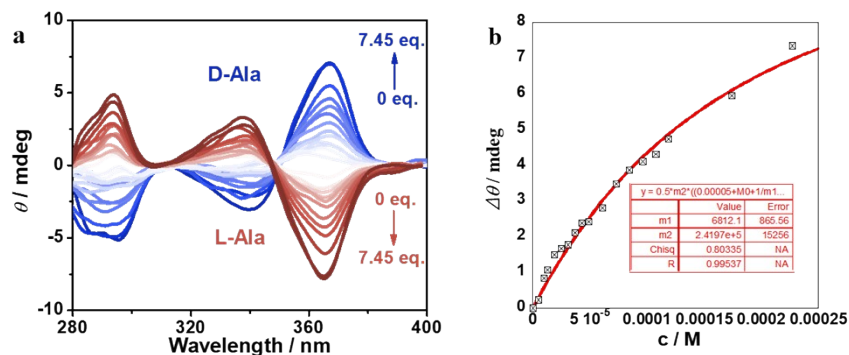

5  
 6 **Fig. S49** (a) CD spectral changes of CN1 ( $5.0 \times 10^{-5}$  M) upon titration with *D*-/*L*-Ala in  $\text{CHCl}_3$  at room temperature. (b) The non-linear  
 7 curve-fitting based on the CD intensity changes at 368 nm upon the addition of *L*-Ala. The host-guest association constant  $K_a$  was estimated  
 8 to be  $6.81 \times 10^3 \text{ M}^{-1}$ .

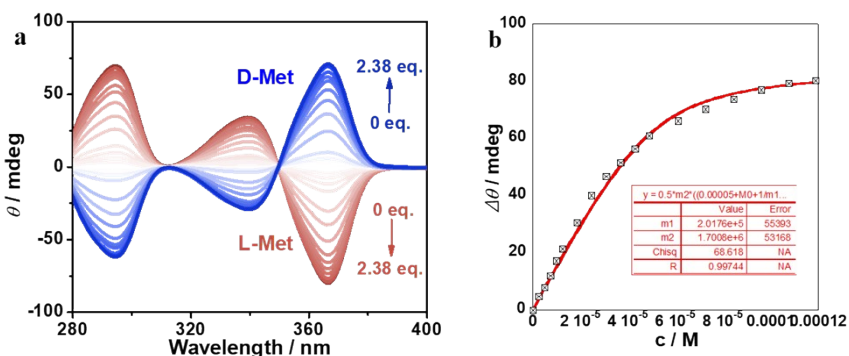

9  
 10 **Fig. S50** (a) CD spectral changes of CN1 ( $5.0 \times 10^{-5}$  M) upon titration with *D*-/*L*-Met in  $\text{CHCl}_3$  at room temperature. (b) The non-linear  
 11 curve-fitting based on the CD intensity changes at 368 nm upon the addition of *L*-Met. The host-guest association constant  $K_a$  was estimated  
 12 to be  $2.02 \times 10^5 \text{ M}^{-1}$ .

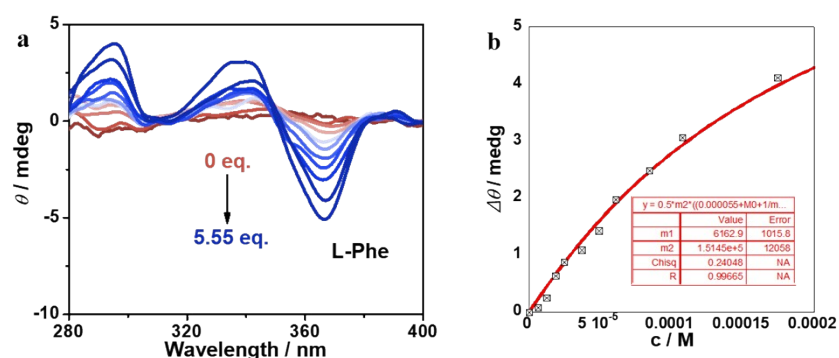

1  
2 **Fig. S51** (a) CD spectral changes of CN1 ( $5.5 \times 10^{-5}$  M) upon titration with *L*-Phe in  $\text{CHCl}_3$  at room temperature. (b) The non-linear curve-  
3 fitting based on the CD intensity changes at 368 nm upon the addition of *L*-Phe. The host-guest association constant  $K_a$  was estimated to  
4 be  $6.16 \times 10^3 \text{ M}^{-1}$ .

5  
6

**Table S1** Association constants and  $\Delta\Delta\varepsilon$  values of  $\text{CD}_{\text{max}}$  at the  $^1L_a$  band upon complexation of amino acid derivatives with N1, CN and N4<sup>a</sup>

| Guest         | N1                              |                                                         | CN                    |                                                         | N4                    |                                                         |
|---------------|---------------------------------|---------------------------------------------------------|-----------------------|---------------------------------------------------------|-----------------------|---------------------------------------------------------|
|               | $K_a / \text{M}^{-1}$           | $\Delta\Delta\varepsilon / \text{M}^{-1}\text{cm}^{-1}$ | $K_a / \text{M}^{-1}$ | $\Delta\Delta\varepsilon / \text{M}^{-1}\text{cm}^{-1}$ | $K_a / \text{M}^{-1}$ | $\Delta\Delta\varepsilon / \text{M}^{-1}\text{cm}^{-1}$ |
| <i>L</i> -Ser | $4.92 \times 10^7$              | -66.2                                                   | $2.11 \times 10^4$    | -19.8                                                   | $1.81 \times 10^6$    | -4.1                                                    |
| <i>L</i> -Ala | $1.32 \times 10^6$              | -76.7                                                   | $1.77 \times 10^4$    | -7.8                                                    | $1.44 \times 10^6$    | -21.9                                                   |
| <i>L</i> -Val | $1.65 \times 10^5$              | +12.2                                                   | \                     | +0.9                                                    | $3.66 \times 10^6$    | +6.4                                                    |
| <i>L</i> -Met | $8.67 \times 10^6$              | +9.3                                                    | $2.02 \times 10^5$    | -80                                                     | $1.17 \times 10^6$    | +5.6                                                    |
| <i>L</i> -Asp | $2.09 \times 10^4$              | -163.4                                                  | \                     | -0.3                                                    | $1.00 \times 10^4$    | -43.1                                                   |
| <i>L</i> -Cys | $1.21 \times 10^4$              | -21.7                                                   | \                     | -0.3                                                    | $2.77 \times 10^3$    | +4.7                                                    |
| <i>L</i> -Leu | $3.23 \times 10^4$ <sup>b</sup> | -3.2                                                    | \                     | -0.2                                                    | $1.72 \times 10^4$    | +16.6                                                   |
| <i>L</i> -Ile | $2.91 \times 10^3$ <sup>b</sup> | -0.9                                                    | \                     | -0.1                                                    | $9.96 \times 10^4$    | +4.1                                                    |
| <i>L</i> -Phe | $6.42 \times 10^5$              | +1.2                                                    | $6.16 \times 10^3$    | -5.1                                                    | $3.42 \times 10^5$    | +3.1                                                    |
| <i>L</i> -Trp | $1.52 \times 10^4$              | +2.4                                                    | \                     | +0.8                                                    | $3.20 \times 10^4$    | +5.2                                                    |

<sup>a</sup>The  $\text{CD}_{\text{max}}$  were recorded upon complexation of 0.5 mM guest with 0.05 mM host. The association constants  $K_a$  were obtained based on the CD spectral titration. <sup>b</sup> $K_a$  were estimated based on the fluorescence titrations data.

7

## 8 6 UV spectra of N1 complexes

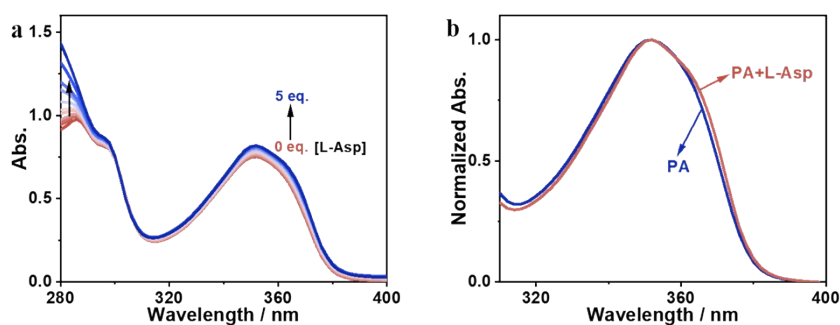

9

10 **Fig. S52** UV-vis spectral changes of 0.05 mM N1 upon increasing the concentration of *L*-Asp (a). Normalized UV-vis spectra of N1 (blue

1 line) and N1+L-Asp (red line). All above in CHCl<sub>3</sub> at room temperature. (The maximum absorption wavelength is redshifted from 350nm  
 2 to 351nm)

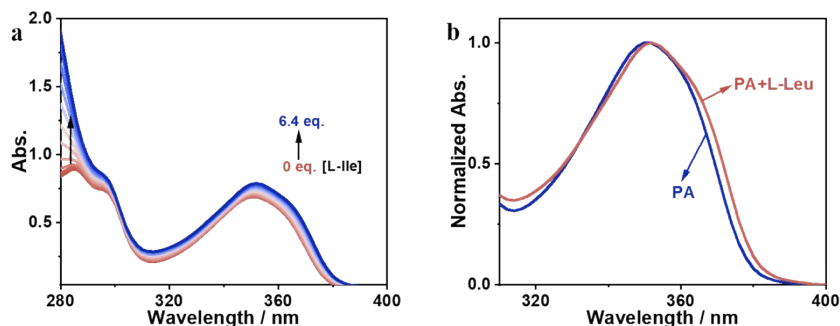

3  
 4 **Fig. S53** UV-vis spectral changes of 0.05 mM N1 upon increasing the concentration of L-Ile (a). Normalized UV-vis spectra of N1 (blue  
 5 line) and N1+L-Ile (red line). All above in CHCl<sub>3</sub> at room temperature. (The maximum absorption wavelength is redshifted from 350nm to  
 6 352nm)

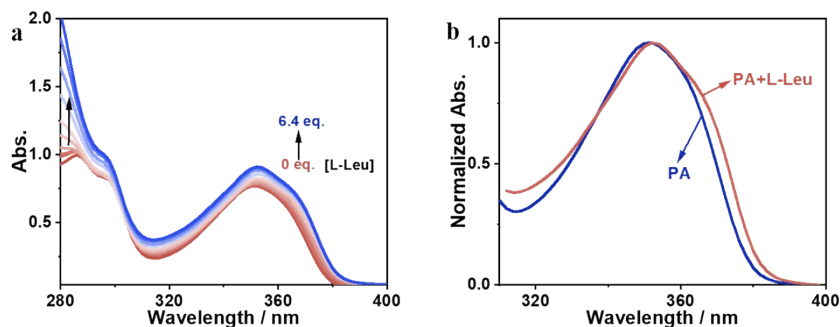

7  
 8 **Fig. S54** UV-vis spectral changes of 0.05 mM N1 upon increasing the concentration of L-Leu (a). Normalized UV-vis spectra of N1 (blue  
 9 line) and N1+L-Leu (red line). All above in CHCl<sub>3</sub> at room temperature. (The maximum absorption wavelength is redshifted from 350nm  
 10 to 353nm)

## 11 12 7 Fluorescence spectra of N1 complexes

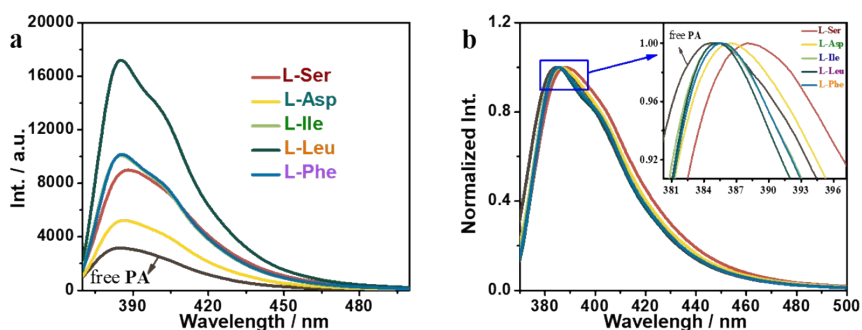

13  
 14 **Fig. S55** a) Fluorescence excitation ( $\lambda_{em} = 350$  nm) spectra of the complexes N1 (0.05 mM) and different amino acid derivatives  
 15 (0.5 mM) in CHCl<sub>3</sub> in CHCl<sub>3</sub> at room temperature. b) Normalized Fluorescence excitation ( $\lambda_{em} = 350$  nm) spectra of the complexes  
 16 N1 and different amino acid derivatives.

17

1 **8 CD and CPL spectra of complex**

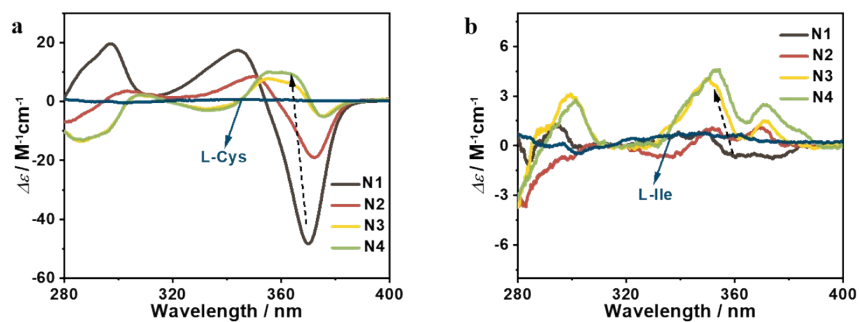

2

3 **Fig. S56** CD spectra of N1-N4 ( $5.0 \times 10^{-5}$  M) in the presence of compound *L*-Cys ( $2.0 \times 10^{-4}$  M) (a) and *L*-Ile ( $2.0 \times 10^{-4}$  M) (b) in  
4  $\text{CHCl}_3$  at 25 °C.

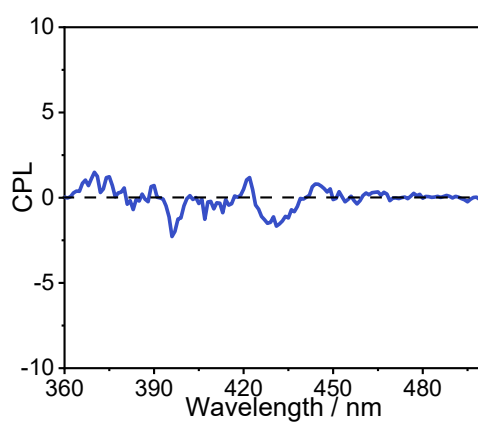

5

6 **Fig. S57** CPL spectra and corresponding  $g_{lum}$  factor of the complexation of N1 (0.05 mM) with *L*-Asp (0.25 mM) in  $\text{CH}_2\text{Cl}_2$  at 25  
7 °C.

8

9 **9 Study on the model of complexes**

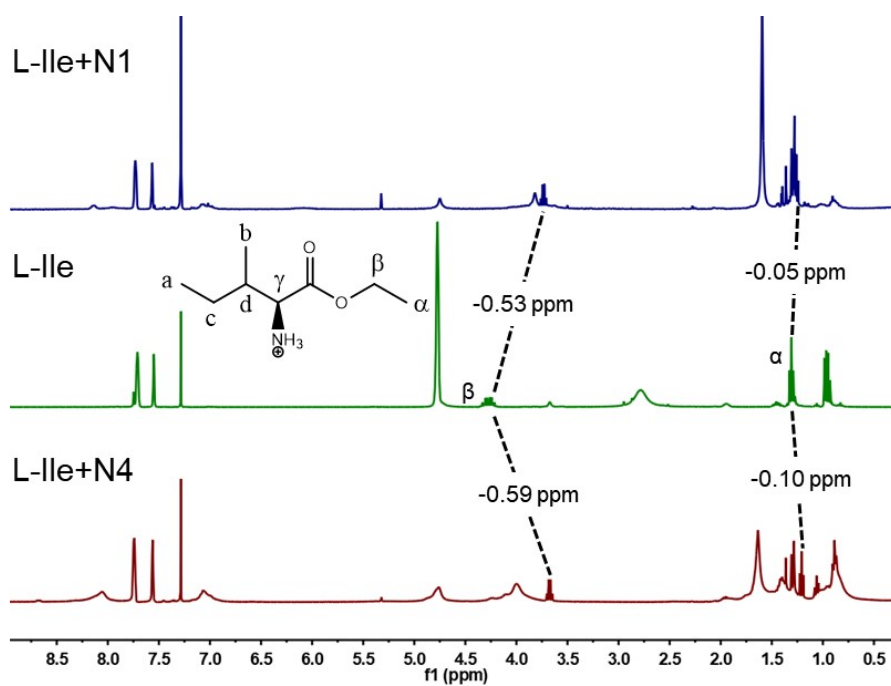

10

1 Fig. S58  $^1\text{H}$  NMR spectra (400 MHz,  $\text{CDCl}_3$ , 298K) of *L*-Ile @N1, *L*-Ile and *L*-Ile @N4.

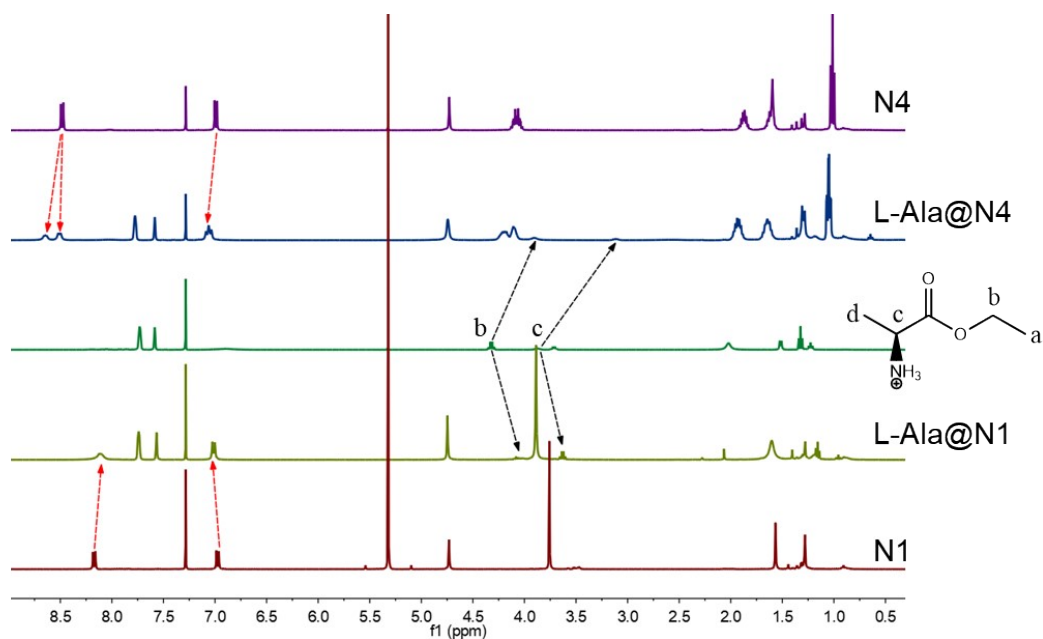

2

3 Fig. S59  $^1\text{H}$  NMR spectra (400 MHz,  $\text{CDCl}_3$ , 298 K) of N1, *L*-Ala@N1, *L*-Ala and *L*-Ala@N4 and N4.

4

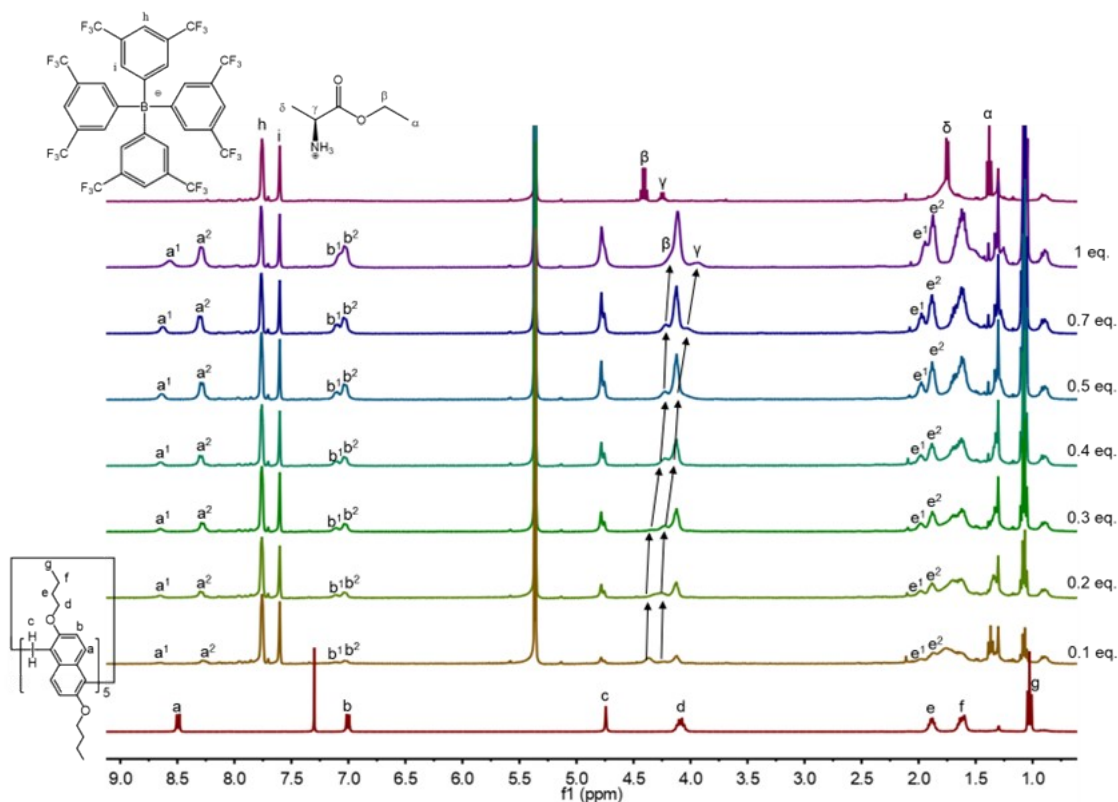

5

6 Fig. S60 Partial  $^1\text{H}$  NMR spectra (400 MHz,  $\text{CD}_2\text{Cl}_2$ , 298 K) of *L*-Ala (2 mM) titrated by N4.

7

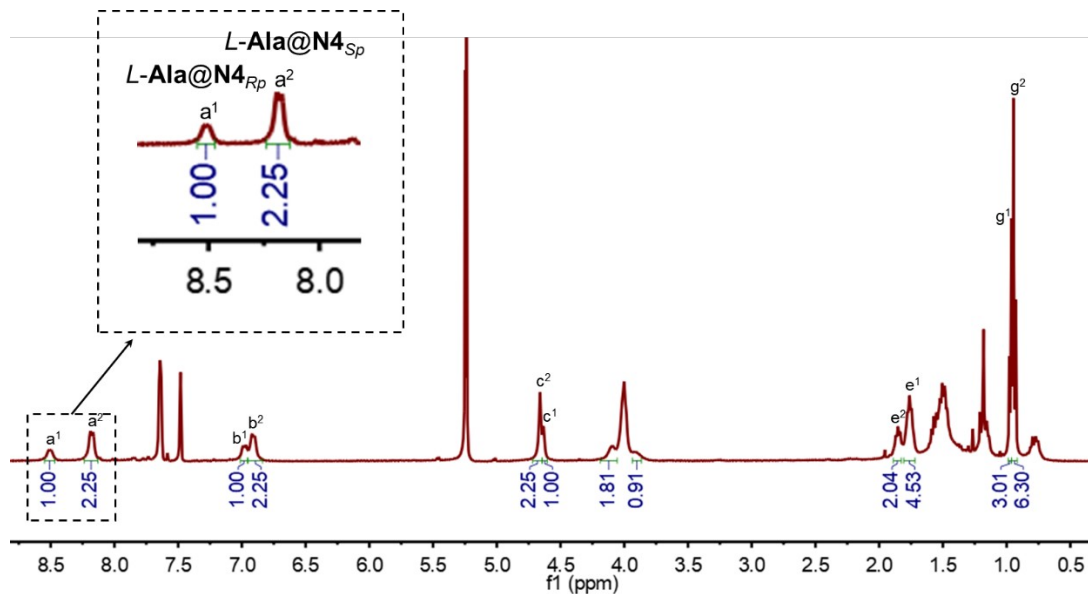

1

2 **Fig. S61**  $^1\text{H}$  NMR (400 MHz, 25°C) spectra of  $L\text{-Ala@N4}$  (1.25 mM) in  $\text{CD}_2\text{Cl}_2$  showing the integrals of the methylene bridge (c),  
 3 the alkyl (e and g) and aromatic protons (a and b) of  $\text{N4}$  detailing the 2.25:1 ratio of major ( $L\text{-Ala@N4}_{Rp}$ ) to minor ( $L\text{-Ala@N4}_{Sp}$ )  
 4 isomers..

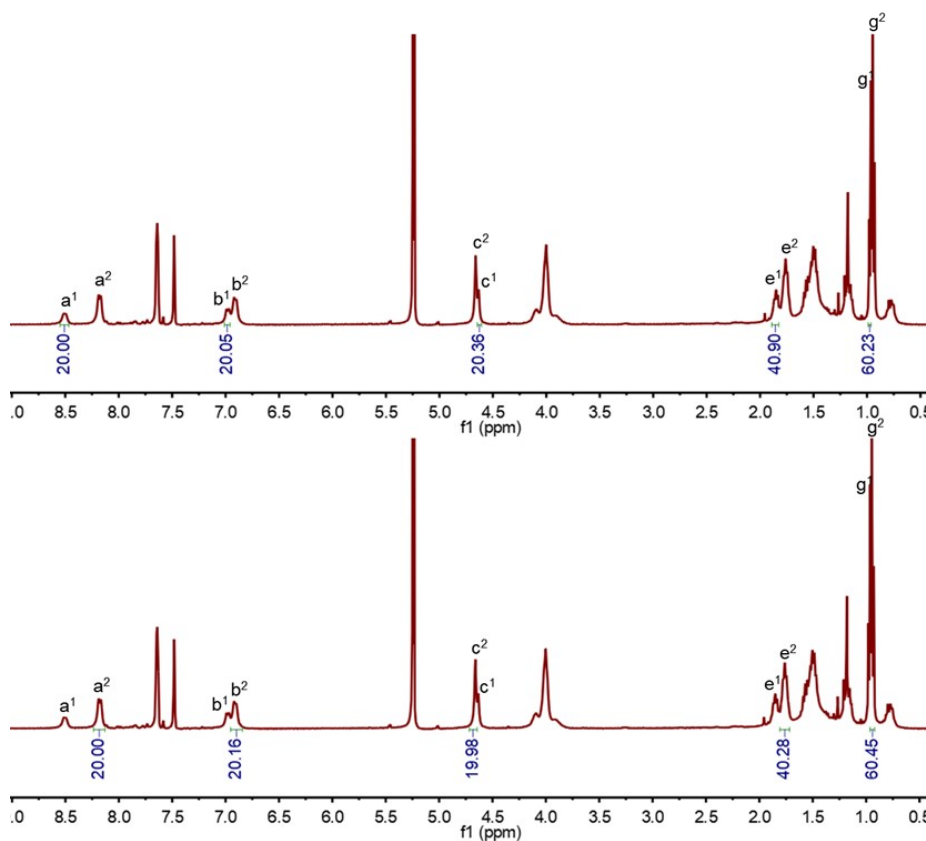

5

6 **Fig. S62**  $^1\text{H}$  NMR (400 MHz, 25°C) spectra of  $L\text{-Ala@N4}$  (1.25 mM) in  $\text{CD}_2\text{Cl}_2$  showing the integrals of the methylene bridge (c),  
 7 the alkyl (e and g) and aromatic protons (a and b) of  $\text{N4}$ . The two sets of signals belonging to the major ( $L\text{-Ala@N4}_{Rp}$ ) and minor ( $L\text{-}$   
 8  $\text{Ala@N4}_{Sp}$ ) species are integrated separately, (bottom) major species and (up) minor species.

9

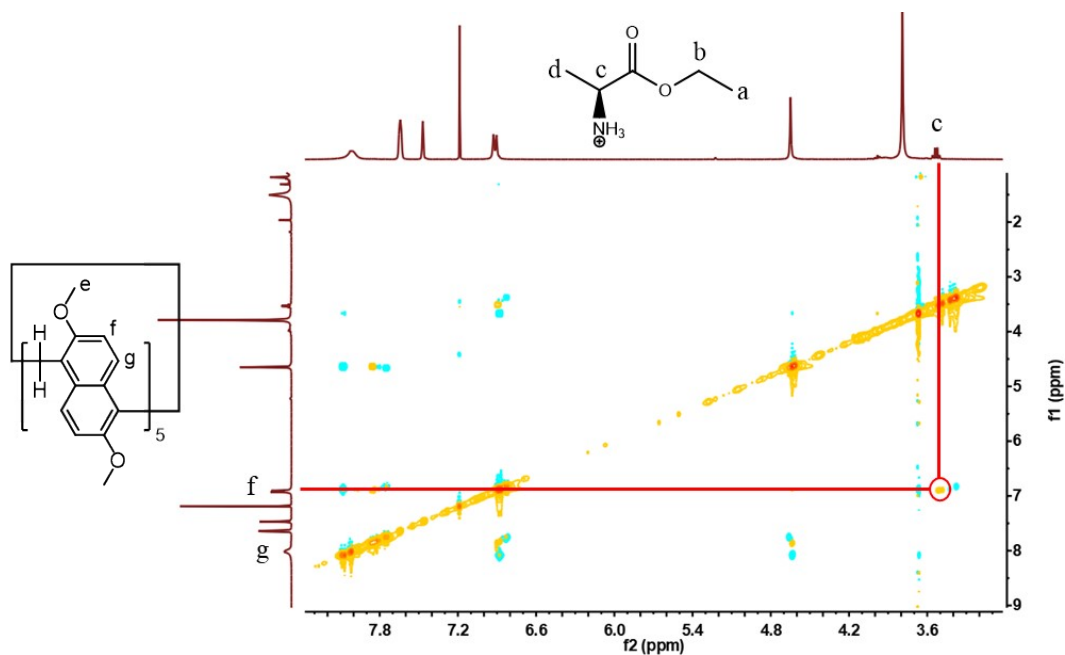

1

2 **Fig. S63**  $^1\text{H}$ - $^1\text{H}$  ROESY NMR spectra of complexes ( $[\text{N1}] = [\text{L-Ala}] = 2 \text{ mM}$ , 400 MHz,  $\text{CDCl}_3$ ).

3

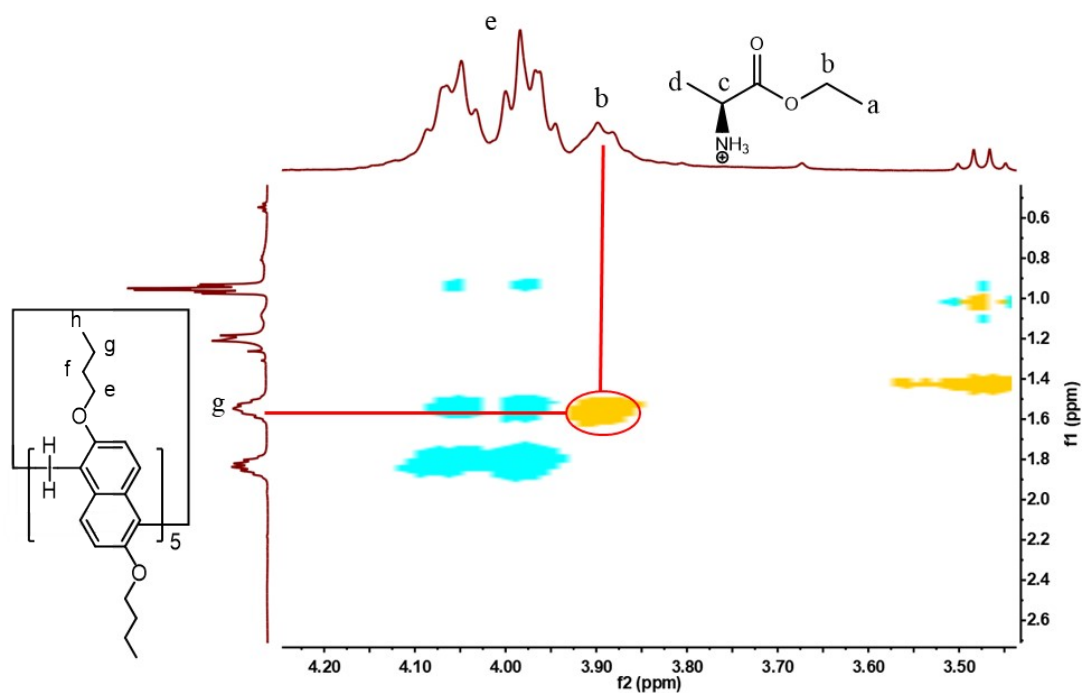

4

5 **Fig. S64**  $^1\text{H}$ - $^1\text{H}$  ROESY NMR spectra of complexes ( $[\text{N4}] = [\text{L-Ala}] = 2 \text{ mM}$ , 400 MHz,  $\text{CDCl}_3$ ).

6

7

## 8 **10 Determination of quantum yield of N1 complex**

9 At room temperature, quinine sulfate in 0.5 mol/L  $\text{H}_2\text{SO}_4$  solution as the reference standard ( $\Phi = 0.55$ ) and the  
 10 prism [5] arene in  $\text{CHCl}_3$  solution as the solution under test. The UV and fluorescence spectra of  $5 \times 10^{-6}$  mol/L  
 11 standard and sample were determined under the same condition. Absorbance ( $A_s$ ,  $A_x$ ) and relative fluorescence  
 12 intensity ( $D_s$ ,  $D_x$ , Area integral intensity) of standard and sample solutions were obtained respectively. Then through  
 13 solution refractive correction, the quantum yield ( $\Phi$ ) of prism[5]arene was calculated.



1 The calculation formula is as follows:

$$\Phi_x = \frac{n_x^2}{n_s^2} \cdot \frac{A_s \cdot D_x}{A_x \cdot D_s} \cdot \Phi_s \quad (A \leq 0.05)$$

2  
3

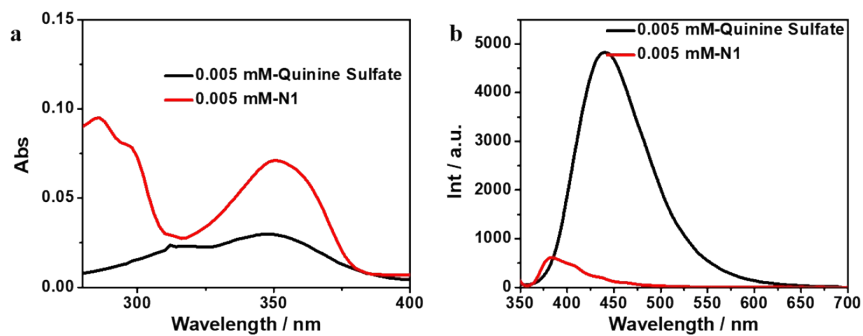

4

5 Fig. S65 The UV-vis a) and fluorescence spectra b) of 0.005 mM N1 and quinine sulfate.

6

7

8

*Table S2* The Spectral data of different compounds.

|                   | Solvent                                  | $\lambda_{ab}$ | $\lambda_{ex}$ | $\Phi$ |
|-------------------|------------------------------------------|----------------|----------------|--------|
| Quinine Sulfate   | 0.5 mol/L H <sub>2</sub> SO <sub>4</sub> | 350            | 440            | 0.55   |
| Prism[5]arene     | CHCl <sub>3</sub>                        | 350            | 384            | 0.10   |
| Prism[5]arene+Ser | CHCl <sub>3</sub>                        | 350            | 388            | 0.29   |
| Prism[5]arene+Cys | CHCl <sub>3</sub>                        | 350            | 385            | 0.32   |
| Prism[5]arene+Ala | CHCl <sub>3</sub>                        | 350            | 391            | 0.37   |
| Prism[5]arene+Asp | CHCl <sub>3</sub>                        | 350            | 386            | 0.20   |
| Prism[5]arene+Lle | CHCl <sub>3</sub>                        | 350            | 385            | 0.37   |
| Prism[5]arene+Phe | CHCl <sub>3</sub>                        | 350            | 385            | 0.27   |
| Prism[5]arene+Leu | CHCl <sub>3</sub>                        | 350            | 385            | 0.49   |

9

10 12 Calculations for Complexation Between the Hosts and L-Ile

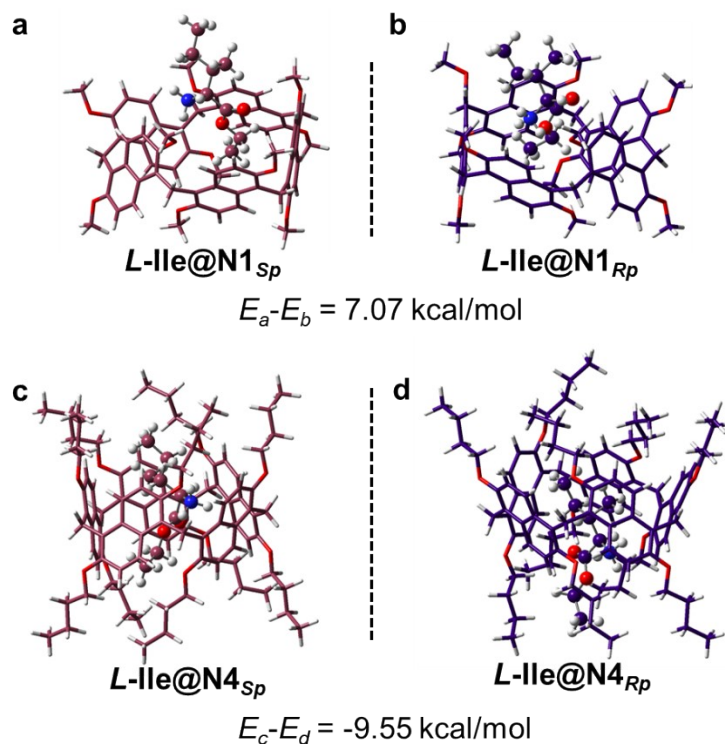

1  
 2 **Fig. S66** The calculated optimal structure of enantiomeric complexes of (a)  $L\text{-Ile@N1}_{Sp}$ , (a)  $L\text{-Ile@N1}_{Rp}$ , (c)  $L\text{-Ile@N4}_{Sp}$ , (d)  $L\text{-Ile@N4}_{Rp}$ .  
 3 Color code: pink for carbon, red for oxygen, blue for nitrogen, and white for hydrogen atoms in (a) and (c); purple for carbon, red for  
 4 oxygen, blue for nitrogen, and white for hydrogen atoms in (b) and (d). Stability order:  $L\text{-Ile@N1}_{Sp} < L\text{-Ile@N1}_{Rp}$ ,  $L\text{-Ile@N4}_{Rp} < L\text{-}$   
 5  $\text{Ile@N4}_{Sp}$ . Solvents and the counter anions were omitted.

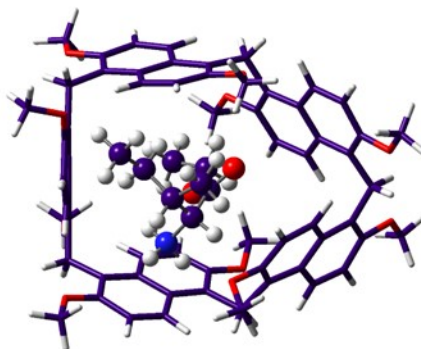

6  
 7 **Fig. S67** Calculated structure of complex  $L\text{-Ile@R-N1}$  at B3LYP/6-31G(d) level.

8  
 9 The atomic coordinates of  $L\text{-Ile@R-N1}$

|    |   |            |             |             |
|----|---|------------|-------------|-------------|
| 10 | C | 5.69590000 | 2.48230000  | 1.76530000  |
| 11 | C | 5.53380000 | 1.13410000  | 1.77570000  |
| 12 | C | 5.51270000 | 0.44690000  | 0.60540000  |
| 13 | C | 5.53300000 | 1.05460000  | -0.60360000 |
| 14 | C | 5.57210000 | 2.39560000  | -0.57670000 |
| 15 | C | 5.67460000 | 3.08470000  | 0.56430000  |
| 16 | C | 5.49810000 | -0.89550000 | 0.59700000  |
| 17 | C | 5.60070000 | -1.57840000 | -0.54650000 |
| 18 | C | 5.69350000 | -0.97380000 | -1.74180000 |

|    |   |             |             |             |
|----|---|-------------|-------------|-------------|
| 1  | c | 5.54450000  | 0.37300000  | -1.77910000 |
| 2  | o | 5.82720000  | 3.17690000  | 2.94890000  |
| 3  | o | 5.75980000  | -1.76320000 | -2.86430000 |
| 4  | c | 5.88770000  | 4.58380000  | 2.93270000  |
| 5  | c | 7.07160000  | -2.11830000 | -3.23560000 |
| 6  | c | 4.37750000  | 3.20570000  | -3.76950000 |
| 7  | c | 4.23780000  | 1.88720000  | -3.48410000 |
| 8  | c | 3.00910000  | 1.31270000  | -3.55000000 |
| 9  | c | 1.86810000  | 2.01240000  | -3.75980000 |
| 10 | c | 2.03610000  | 3.32950000  | -3.96990000 |
| 11 | c | 3.24670000  | 3.89950000  | -3.98600000 |
| 12 | c | 2.87650000  | -0.01590000 | -3.41580000 |
| 13 | c | 1.69160000  | -0.62090000 | -3.50460000 |
| 14 | c | 0.56380000  | 0.06800000  | -3.72220000 |
| 15 | c | 0.64360000  | 1.41880000  | -3.76870000 |
| 16 | o | 5.62660000  | 3.78620000  | -3.77860000 |
| 17 | o | -0.62070000 | -0.61970000 | -3.74440000 |
| 18 | c | 5.74330000  | 5.18920000  | -3.81900000 |
| 19 | c | -0.89130000 | -1.26030000 | -4.97130000 |
| 20 | c | -4.82620000 | 1.90050000  | 2.59540000  |
| 21 | c | -4.48230000 | 0.91580000  | 1.72930000  |
| 22 | c | -3.51340000 | 0.02210000  | 2.04460000  |
| 23 | c | -2.76020000 | 0.14100000  | 3.16180000  |
| 24 | c | -3.14310000 | 1.10300000  | 4.02000000  |
| 25 | c | -4.14240000 | 1.95020000  | 3.75030000  |
| 26 | c | -3.26310000 | -1.02810000 | 1.24570000  |
| 27 | c | -2.30570000 | -1.90890000 | 1.54980000  |
| 28 | c | -1.50930000 | -1.76010000 | 2.61930000  |
| 29 | c | -1.69340000 | -0.66740000 | 3.39600000  |
| 30 | o | -5.82070000 | 2.79360000  | 2.26670000  |
| 31 | o | -0.48390000 | -2.64870000 | 2.82330000  |
| 32 | c | -6.11740000 | 3.85820000  | 3.13990000  |
| 33 | c | -0.87290000 | -3.86820000 | 3.41260000  |
| 34 | c | 0.52140000  | 1.53360000  | 3.64300000  |
| 35 | c | 0.62740000  | 0.23800000  | 4.03570000  |
| 36 | c | 1.84050000  | -0.37910000 | 4.00960000  |
| 37 | c | 2.96920000  | 0.25310000  | 3.60690000  |
| 38 | c | 2.82690000  | 1.54590000  | 3.28260000  |
| 39 | c | 1.64870000  | 2.17000000  | 3.29390000  |
| 40 | c | 2.01500000  | -1.65080000 | 4.40780000  |
| 41 | c | 3.21000000  | -2.25100000 | 4.37040000  |
| 42 | c | 4.31920000  | -1.63410000 | 3.92850000  |
| 43 | c | 4.19170000  | -0.33760000 | 3.55010000  |
| 44 | o | -0.68870000 | 2.17760000  | 3.67390000  |

|    |   |             |             |             |
|----|---|-------------|-------------|-------------|
| 1  | O | 5.55060000  | -2.24900000 | 3.92100000  |
| 2  | C | -0.74820000 | 3.58120000  | 3.57000000  |
| 3  | C | 5.77000000  | -3.37180000 | 4.74330000  |
| 4  | C | -0.98720000 | 2.98990000  | -1.57990000 |
| 5  | C | -1.49710000 | 2.20800000  | -2.56360000 |
| 6  | C | -2.65360000 | 1.52270000  | -2.35330000 |
| 7  | C | -3.32500000 | 1.56920000  | -1.17660000 |
| 8  | C | -2.83410000 | 2.41470000  | -0.25650000 |
| 9  | C | -1.70330000 | 3.09950000  | -0.44950000 |
| 10 | C | -3.22180000 | 0.76750000  | -3.30940000 |
| 11 | C | -4.33280000 | 0.05480000  | -3.09590000 |
| 12 | C | -4.96410000 | 0.04990000  | -1.91050000 |
| 13 | C | -4.44510000 | 0.83820000  | -0.93630000 |
| 14 | O | 0.17780000  | 3.68770000  | -1.78760000 |
| 15 | O | -6.11500000 | -0.66910000 | -1.67570000 |
| 16 | C | 0.50770000  | 4.76640000  | -0.94360000 |
| 17 | C | -6.74290000 | -1.34830000 | -2.73810000 |
| 18 | C | 5.50240000  | 1.07460000  | -3.14980000 |
| 19 | C | -0.69050000 | 2.17110000  | -3.87600000 |
| 20 | C | -0.67420000 | -0.43510000 | 4.51820000  |
| 21 | C | 5.46930000  | 0.42440000  | 3.13750000  |
| 22 | C | -5.22270000 | 0.86090000  | 0.39180000  |
| 23 | H | 5.58890000  | 2.99480000  | -1.49130000 |
| 24 | H | 5.75770000  | 4.17920000  | 0.47200000  |
| 25 | H | 5.46180000  | -1.49560000 | 1.51460000  |
| 26 | H | 5.63280000  | -2.68020000 | -0.50060000 |
| 27 | H | 5.96870000  | 4.93010000  | 3.98760000  |
| 28 | H | 6.79500000  | 4.92760000  | 2.38800000  |
| 29 | H | 4.95230000  | 5.00640000  | 2.50260000  |
| 30 | H | 7.01450000  | -2.73140000 | -4.16250000 |
| 31 | H | 7.67100000  | -1.20260000 | -3.43760000 |
| 32 | H | 7.54630000  | -2.72040000 | -2.42900000 |
| 33 | H | 1.20160000  | 4.01300000  | -4.17950000 |
| 34 | H | 3.27760000  | 4.98070000  | -4.19540000 |
| 35 | H | 3.72390000  | -0.68660000 | -3.25870000 |
| 36 | H | 1.64280000  | -1.71640000 | -3.39950000 |
| 37 | H | 6.82410000  | 5.44060000  | -3.73090000 |
| 38 | H | 5.37990000  | 5.58280000  | -4.79410000 |
| 39 | H | 5.20980000  | 5.64650000  | -2.95570000 |
| 40 | H | -1.88560000 | -1.75400000 | -4.89170000 |
| 41 | H | -0.91660000 | -0.51310000 | -5.79540000 |
| 42 | H | -0.12220000 | -2.03680000 | -5.17990000 |
| 43 | H | -2.66520000 | 1.25460000  | 4.99840000  |
| 44 | H | -4.36710000 | 2.71150000  | 4.51410000  |

|    |   |             |             |             |
|----|---|-------------|-------------|-------------|
| 1  | H | -3.84510000 | -1.23660000 | 0.33580000  |
| 2  | H | -2.16360000 | -2.77540000 | 0.88490000  |
| 3  | H | -6.92110000 | 4.46750000  | 2.66880000  |
| 4  | H | -6.50390000 | 3.47020000  | 4.10850000  |
| 5  | H | -5.22490000 | 4.50950000  | 3.27450000  |
| 6  | H | 0.03910000  | -4.48490000 | 3.57500000  |
| 7  | H | -1.36300000 | -3.67480000 | 4.39240000  |
| 8  | H | -1.56430000 | -4.41560000 | 2.73490000  |
| 9  | H | 3.66590000  | 2.17130000  | 2.97870000  |
| 10 | H | 1.64690000  | 3.23050000  | 2.99610000  |
| 11 | H | 1.20100000  | -2.27620000 | 4.79710000  |
| 12 | H | 3.24810000  | -3.29530000 | 4.72000000  |
| 13 | H | -1.81030000 | 3.88650000  | 3.70210000  |
| 14 | H | -0.14630000 | 4.05460000  | 4.37730000  |
| 15 | H | -0.42770000 | 3.91310000  | 2.55830000  |
| 16 | H | 6.85770000  | -3.60640000 | 4.71150000  |
| 17 | H | 5.49080000  | -3.14020000 | 5.79540000  |
| 18 | H | 5.22290000  | -4.25800000 | 4.35210000  |
| 19 | H | -3.33160000 | 2.60470000  | 0.70090000  |
| 20 | H | -1.37680000 | 3.75800000  | 0.36990000  |
| 21 | H | -2.82060000 | 0.68710000  | -4.32810000 |
| 22 | H | -4.71190000 | -0.53550000 | -3.94540000 |
| 23 | H | 1.42720000  | 5.24350000  | -1.35160000 |
| 24 | H | -0.31000000 | 5.52100000  | -0.94520000 |
| 25 | H | 0.74150000  | 4.40910000  | 0.08330000  |
| 26 | H | -7.67100000 | -1.81560000 | -2.33860000 |
| 27 | H | -7.03340000 | -0.63220000 | -3.53890000 |
| 28 | H | -6.08810000 | -2.16310000 | -3.11990000 |
| 29 | H | 5.64610000  | 0.38160000  | -4.00800000 |
| 30 | H | 6.43960000  | 1.67170000  | -3.20540000 |
| 31 | H | -1.23250000 | 1.75740000  | -4.74910000 |
| 32 | H | -0.60350000 | 3.21990000  | -4.22420000 |
| 33 | H | -0.53590000 | -1.38810000 | 5.06470000  |
| 34 | H | -1.05270000 | 0.17720000  | 5.36150000  |
| 35 | H | 6.39060000  | -0.19830000 | 3.17370000  |
| 36 | H | 5.65310000  | 1.11740000  | 3.98960000  |
| 37 | H | -5.89440000 | -0.01900000 | 0.51870000  |
| 38 | H | -5.92750000 | 1.71150000  | 0.25130000  |
| 39 | C | 2.88080000  | -3.69730000 | -1.24090000 |
| 40 | C | 1.47170000  | -4.20530000 | -0.88310000 |
| 41 | C | 3.62310000  | -4.57670000 | -2.25670000 |
| 42 | C | 0.71020000  | -3.27260000 | 0.07600000  |
| 43 | C | 0.26090000  | -1.93360000 | -0.48440000 |
| 44 | O | 1.17590000  | -1.00170000 | -0.12170000 |

|    |   |             |             |             |
|----|---|-------------|-------------|-------------|
| 1  | C | 0.78820000  | 0.34240000  | -0.09130000 |
| 2  | C | 2.04170000  | 1.20080000  | 0.00250000  |
| 3  | O | -0.78630000 | -1.72690000 | -1.05500000 |
| 4  | N | 1.54940000  | -3.03500000 | 1.30840000  |
| 5  | C | 0.60710000  | -4.48370000 | -2.12660000 |
| 6  | H | 2.82810000  | -2.65520000 | -1.62890000 |
| 7  | H | 3.49470000  | -3.66660000 | -0.31020000 |
| 8  | H | 1.60440000  | -5.18490000 | -0.35390000 |
| 9  | H | 3.17610000  | -4.49700000 | -3.27310000 |
| 10 | H | 4.68990000  | -4.27240000 | -2.35090000 |
| 11 | H | 3.61120000  | -5.64650000 | -1.94720000 |
| 12 | H | -0.21210000 | -3.80400000 | 0.40810000  |
| 13 | H | 0.22320000  | 0.60530000  | -1.01060000 |
| 14 | H | 0.13690000  | 0.49780000  | 0.80000000  |
| 15 | H | 2.70550000  | 0.83850000  | 0.81580000  |
| 16 | H | 2.63190000  | 1.15950000  | -0.93730000 |
| 17 | H | 1.79570000  | 2.26730000  | 0.20180000  |
| 18 | H | 1.52230000  | -3.88250000 | 1.91890000  |
| 19 | H | 2.53680000  | -2.84180000 | 1.02970000  |
| 20 | H | 1.19290000  | -2.20740000 | 1.83510000  |
| 21 | H | -0.42230000 | -4.79880000 | -1.84060000 |
| 22 | H | 0.51420000  | -3.58270000 | -2.77160000 |
| 23 | H | 1.02380000  | -5.30620000 | -2.74940000 |

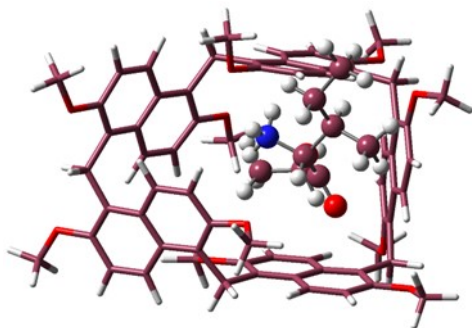

24

25 **Fig. S68** Calculated structure of complex *L-Ile@S-N1* at B3LYP/6-31G(d) level.

26

27 The atomic coordinates of *L-Ile@S-N1*

|    |   |             |             |             |
|----|---|-------------|-------------|-------------|
| 28 | C | -5.28020000 | 3.45950000  | -0.98410000 |
| 29 | C | -5.34340000 | 2.11350000  | -0.82080000 |
| 30 | C | -4.86750000 | 1.29270000  | -1.79240000 |
| 31 | C | -4.21860000 | 1.74490000  | -2.89020000 |
| 32 | C | -4.09780000 | 3.07870000  | -2.97650000 |
| 33 | C | -4.62840000 | 3.90700000  | -2.07080000 |
| 34 | C | -5.05790000 | -0.03390000 | -1.72970000 |
| 35 | C | -4.66220000 | -0.84790000 | -2.71300000 |
| 36 | C | -3.99720000 | -0.40630000 | -3.79390000 |

|    |   |             |             |             |
|----|---|-------------|-------------|-------------|
| 1  | C | -3.74290000 | 0.92580000  | -3.86570000 |
| 2  | O | -5.84900000 | 4.30040000  | -0.05170000 |
| 3  | O | -3.63050000 | -1.26260000 | -4.80840000 |
| 4  | C | -5.77610000 | 5.69540000  | -0.23120000 |
| 5  | C | -4.44600000 | -2.38020000 | -5.07660000 |
| 6  | C | -1.46500000 | 3.44750000  | -5.21150000 |
| 7  | C | -1.62400000 | 2.15770000  | -4.82420000 |
| 8  | C | -0.58340000 | 1.50050000  | -4.25200000 |
| 9  | C | 0.58840000  | 2.09050000  | -3.91610000 |
| 10 | C | 0.69400000  | 3.38220000  | -4.27430000 |
| 11 | C | -0.28540000 | 4.02430000  | -4.92290000 |
| 12 | C | -0.66930000 | 0.18190000  | -4.02580000 |
| 13 | C | 0.32000000  | -0.50460000 | -3.45500000 |
| 14 | C | 1.45570000  | 0.08420000  | -3.05930000 |
| 15 | C | 1.58360000  | 1.41550000  | -3.27750000 |
| 16 | O | -2.46830000 | 4.09250000  | -5.90090000 |
| 17 | O | 2.38640000  | -0.67370000 | -2.39350000 |
| 18 | C | -2.19690000 | 5.31810000  | -6.53950000 |
| 19 | C | 3.09500000  | -1.58060000 | -3.20930000 |
| 20 | C | 3.57650000  | 1.81110000  | 4.85550000  |
| 21 | C | 3.63990000  | 0.92540000  | 3.83200000  |
| 22 | C | 2.57020000  | 0.15320000  | 3.51950000  |
| 23 | C | 1.36230000  | 0.31270000  | 4.10880000  |
| 24 | C | 1.33640000  | 1.17630000  | 5.14040000  |
| 25 | C | 2.40750000  | 1.88660000  | 5.51240000  |
| 26 | C | 2.67350000  | -0.80980000 | 2.59020000  |
| 27 | C | 1.61350000  | -1.53180000 | 2.22300000  |
| 28 | C | 0.39880000  | -1.34190000 | 2.76110000  |
| 29 | C | 0.25710000  | -0.35370000 | 3.67750000  |
| 30 | O | 4.68560000  | 2.55330000  | 5.19230000  |
| 31 | O | -0.64360000 | -2.06250000 | 2.23820000  |
| 32 | C | 4.67200000  | 3.32910000  | 6.36780000  |
| 33 | C | -0.95960000 | -3.25130000 | 2.92700000  |
| 34 | C | -1.62120000 | 2.02390000  | 2.96780000  |
| 35 | C | -2.05530000 | 0.76960000  | 3.24990000  |
| 36 | C | -3.24170000 | 0.33350000  | 2.74540000  |
| 37 | C | -4.01440000 | 1.10510000  | 1.94370000  |
| 38 | C | -3.56930000 | 2.35040000  | 1.72030000  |
| 39 | C | -2.41710000 | 2.80170000  | 2.21850000  |
| 40 | C | -3.74010000 | -0.88630000 | 3.01130000  |
| 41 | C | -4.91740000 | -1.29720000 | 2.52480000  |
| 42 | C | -5.67880000 | -0.53230000 | 1.72300000  |
| 43 | C | -5.18590000 | 0.68820000  | 1.39720000  |
| 44 | O | -0.44090000 | 2.48540000  | 3.49240000  |

|    |   |             |             |             |
|----|---|-------------|-------------|-------------|
| 1  | O | -6.88830000 | -0.94940000 | 1.21280000  |
| 2  | C | -0.17170000 | 3.86800000  | 3.50740000  |
| 3  | C | -7.30540000 | -2.28010000 | 1.41050000  |
| 4  | C | 2.26160000  | 3.06830000  | -0.69150000 |
| 5  | C | 3.07690000  | 2.17550000  | -1.30400000 |
| 6  | C | 3.98110000  | 1.46470000  | -0.58000000 |
| 7  | C | 4.07470000  | 1.58220000  | 0.76550000  |
| 8  | C | 3.30450000  | 2.52320000  | 1.33630000  |
| 9  | C | 2.42930000  | 3.24490000  | 0.62910000  |
| 10 | C | 4.84590000  | 0.60710000  | -1.14970000 |
| 11 | C | 5.70460000  | -0.12650000 | -0.43330000 |
| 12 | C | 5.74820000  | -0.06820000 | 0.90780000  |
| 13 | C | 4.90880000  | 0.81090000  | 1.50870000  |
| 14 | O | 1.35740000  | 3.78800000  | -1.43560000 |
| 15 | O | 6.60750000  | -0.82940000 | 1.66750000  |
| 16 | C | 0.71320000  | 4.90560000  | -0.87150000 |
| 17 | C | 7.60390000  | -1.59700000 | 1.03330000  |
| 18 | C | -2.97700000 | 1.46890000  | -5.09180000 |
| 19 | C | 2.90370000  | 2.05170000  | -2.82420000 |
| 20 | C | -1.16110000 | -0.06070000 | 4.18810000  |
| 21 | C | -6.02080000 | 1.57400000  | 0.45180000  |
| 22 | C | 4.95340000  | 0.86340000  | 3.04390000  |
| 23 | H | -3.60410000 | 3.56340000  | -3.82390000 |
| 24 | H | -4.51090000 | 4.98540000  | -2.26250000 |
| 25 | H | -5.59060000 | -0.51180000 | -0.89960000 |
| 26 | H | -4.89940000 | -1.91690000 | -2.59650000 |
| 27 | H | -6.30310000 | 6.17370000  | 0.62480000  |
| 28 | H | -4.71610000 | 6.03390000  | -0.21320000 |
| 29 | H | -6.29800000 | 5.99440000  | -1.16730000 |
| 30 | H | -4.12240000 | -2.80990000 | -6.05110000 |
| 31 | H | -4.30810000 | -3.16630000 | -4.30330000 |
| 32 | H | -5.51080000 | -2.06810000 | -5.16120000 |
| 33 | H | 1.59740000  | 3.98120000  | -4.09460000 |
| 34 | H | -0.08470000 | 5.06980000  | -5.20650000 |
| 35 | H | -1.54000000 | -0.41230000 | -4.30920000 |
| 36 | H | 0.18440000  | -1.58560000 | -3.30190000 |
| 37 | H | -3.10510000 | 5.60730000  | -7.11470000 |
| 38 | H | -2.00340000 | 6.11460000  | -5.78710000 |
| 39 | H | -1.35260000 | 5.20350000  | -7.25540000 |
| 40 | H | 3.86530000  | -2.08050000 | -2.58030000 |
| 41 | H | 2.41220000  | -2.35820000 | -3.61650000 |
| 42 | H | 3.59730000  | -1.03430000 | -4.03850000 |
| 43 | H | 0.43880000  | 1.35680000  | 5.74850000  |
| 44 | H | 2.27980000  | 2.56820000  | 6.36850000  |



|    |   |             |             |             |
|----|---|-------------|-------------|-------------|
| 1  | H | 3.61850000  | -1.06790000 | 2.09440000  |
| 2  | H | 1.74970000  | -2.30140000 | 1.44450000  |
| 3  | H | 5.67870000  | 3.79090000  | 6.47940000  |
| 4  | H | 3.92660000  | 4.15090000  | 6.28240000  |
| 5  | H | 4.48530000  | 2.68440000  | 7.25540000  |
| 6  | H | -1.90750000 | -3.65670000 | 2.50870000  |
| 7  | H | -0.14530000 | -3.99490000 | 2.77540000  |
| 8  | H | -1.09080000 | -3.06470000 | 4.01320000  |
| 9  | H | -4.12770000 | 3.07720000  | 1.12730000  |
| 10 | H | -2.14620000 | 3.84110000  | 1.97520000  |
| 11 | H | -3.22690000 | -1.61780000 | 3.64890000  |
| 12 | H | -5.24030000 | -2.31000000 | 2.81440000  |
| 13 | H | 0.79110000  | 4.02060000  | 4.04470000  |
| 14 | H | -0.04470000 | 4.25680000  | 2.47460000  |
| 15 | H | -0.97230000 | 4.40960000  | 4.05880000  |
| 16 | H | -8.26880000 | -2.41610000 | 0.86960000  |
| 17 | H | -6.56280000 | -2.98640000 | 0.97600000  |
| 18 | H | -7.48980000 | -2.47480000 | 2.49040000  |
| 19 | H | 3.35820000  | 2.76220000  | 2.40680000  |
| 20 | H | 1.83790000  | 3.99000000  | 1.18160000  |
| 21 | H | 4.90870000  | 0.44770000  | -2.23440000 |
| 22 | H | 6.36680000  | -0.80440000 | -0.99530000 |
| 23 | H | 0.09900000  | 5.37800000  | -1.67090000 |
| 24 | H | 0.02430000  | 4.59040000  | -0.05710000 |
| 25 | H | 1.46410000  | 5.64810000  | -0.52110000 |
| 26 | H | 8.21910000  | -2.07500000 | 1.82840000  |
| 27 | H | 7.14370000  | -2.40760000 | 0.42540000  |
| 28 | H | 8.26880000  | -0.94320000 | 0.42600000  |
| 29 | H | -2.77560000 | 0.70080000  | -5.87070000 |
| 30 | H | -3.70430000 | 2.12260000  | -5.62300000 |
| 31 | H | 3.70420000  | 1.49240000  | -3.34750000 |
| 32 | H | 3.10680000  | 3.05820000  | -3.24190000 |
| 33 | H | -1.59260000 | -1.02340000 | 4.51490000  |
| 34 | H | -1.19680000 | 0.46490000  | 5.16370000  |
| 35 | H | -6.95860000 | 1.08970000  | 0.09950000  |
| 36 | H | -6.42300000 | 2.37820000  | 1.10800000  |
| 37 | H | 5.47950000  | -0.00700000 | 3.49840000  |
| 38 | H | 5.61780000  | 1.73560000  | 3.24220000  |
| 39 | C | -0.34180000 | -4.77550000 | -2.44230000 |
| 40 | C | -1.44980000 | -3.76960000 | -2.06650000 |
| 41 | C | -0.56590000 | -5.47970000 | -3.78800000 |
| 42 | C | -1.15930000 | -3.04750000 | -0.73560000 |
| 43 | C | -2.03700000 | -1.82520000 | -0.51610000 |
| 44 | O | -1.38390000 | -0.78170000 | -1.08100000 |

|    |   |             |             |             |
|----|---|-------------|-------------|-------------|
| 1  | C | -1.64850000 | 0.54120000  | -0.71660000 |
| 2  | C | -0.42600000 | 1.10160000  | -0.00170000 |
| 3  | O | -3.07390000 | -1.79460000 | 0.10450000  |
| 4  | N | 0.27920000  | -2.59070000 | -0.73430000 |
| 5  | C | -2.82560000 | -4.45670000 | -1.98120000 |
| 6  | H | 0.63710000  | -4.24350000 | -2.51500000 |
| 7  | H | -0.24180000 | -5.53780000 | -1.63390000 |
| 8  | H | -1.50990000 | -3.00280000 | -2.87790000 |
| 9  | H | -1.43500000 | -6.17370000 | -3.75620000 |
| 10 | H | -0.73750000 | -4.74050000 | -4.60370000 |
| 11 | H | 0.32270000  | -6.09150000 | -4.06820000 |
| 12 | H | -1.28950000 | -3.74670000 | 0.12050000  |
| 13 | H | -1.83050000 | 1.12600000  | -1.64560000 |
| 14 | H | -2.55480000 | 0.61480000  | -0.08680000 |
| 15 | H | -0.24460000 | 0.57410000  | 0.95950000  |
| 16 | H | 0.49020000  | 0.97670000  | -0.61900000 |
| 17 | H | -0.54770000 | 2.18630000  | 0.21450000  |
| 18 | H | 0.42510000  | -1.90750000 | 0.04200000  |
| 19 | H | 0.50990000  | -2.13470000 | -1.64280000 |
| 20 | H | 0.90530000  | -3.41520000 | -0.59330000 |
| 21 | H | -3.14410000 | -4.87810000 | -2.95990000 |
| 22 | H | -2.81310000 | -5.28670000 | -1.23900000 |
| 23 | H | -3.62420000 | -3.74570000 | -1.67480000 |

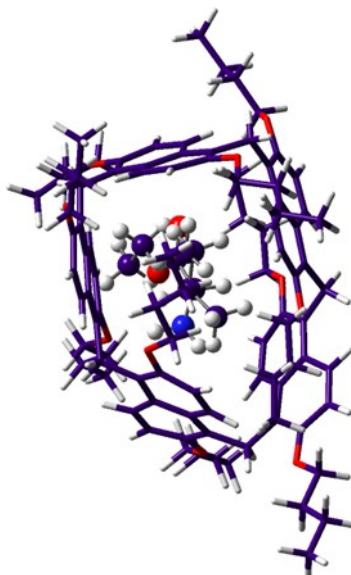

24

25 **Fig. S69** Calculated structure of complex *L-Ile@R-N4* at B3LYP/6-31G(d) level.

26

27 The atomic coordinates of *L-Ile@R-N4*

|    |   |             |             |             |
|----|---|-------------|-------------|-------------|
| 28 | C | -2.80430000 | -0.52820000 | -4.44110000 |
| 29 | C | -3.10050000 | 0.43600000  | -3.53590000 |
| 30 | C | -2.10030000 | 1.15800000  | -2.96700000 |

|    |   |             |             |             |
|----|---|-------------|-------------|-------------|
| 1  | C | -0.78420000 | 0.91160000  | -3.17730000 |
| 2  | C | -0.53620000 | 0.00450000  | -4.13650000 |
| 3  | C | -1.50650000 | -0.68340000 | -4.74850000 |
| 4  | C | -2.37820000 | 2.19830000  | -2.16820000 |
| 5  | C | -1.41360000 | 2.86930000  | -1.53350000 |
| 6  | C | -0.11180000 | 2.54390000  | -1.63210000 |
| 7  | C | 0.21060000  | 1.54830000  | -2.49790000 |
| 8  | O | -3.81260000 | -1.25370000 | -5.03420000 |
| 9  | O | 0.86430000  | 3.19060000  | -0.90480000 |
| 10 | C | -3.51440000 | -2.14530000 | -6.07660000 |
| 11 | C | 0.47700000  | 4.15770000  | 0.04150000  |
| 12 | C | 2.23570000  | -0.94680000 | -1.63490000 |
| 13 | C | 2.44030000  | 0.39610000  | -1.61200000 |
| 14 | C | 3.30100000  | 0.91520000  | -0.68880000 |
| 15 | C | 3.87670000  | 0.16700000  | 0.28450000  |
| 16 | C | 3.67860000  | -1.15300000 | 0.19640000  |
| 17 | C | 2.91100000  | -1.69130000 | -0.74740000 |
| 18 | C | 3.66480000  | 2.20880000  | -0.67090000 |
| 19 | C | 4.52270000  | 2.69370000  | 0.23510000  |
| 20 | C | 5.05790000  | 1.94610000  | 1.21660000  |
| 21 | C | 4.66260000  | 0.65090000  | 1.28140000  |
| 22 | O | 1.39120000  | -1.57430000 | -2.51990000 |
| 23 | O | 5.91450000  | 2.47840000  | 2.15390000  |
| 24 | C | 1.86690000  | -2.73560000 | -3.16410000 |
| 25 | C | 5.79680000  | 3.84230000  | 2.47040000  |
| 26 | C | -1.22290000 | -2.14560000 | 6.27740000  |
| 27 | C | -0.84300000 | -0.87740000 | 5.98570000  |
| 28 | C | -1.62930000 | -0.13730000 | 5.16040000  |
| 29 | C | -2.75760000 | -0.58730000 | 4.55730000  |
| 30 | C | -3.11330000 | -1.83460000 | 4.90730000  |
| 31 | C | -2.36650000 | -2.58440000 | 5.72520000  |
| 32 | C | -1.30590000 | 1.13570000  | 4.90340000  |
| 33 | C | -2.00500000 | 1.89120000  | 4.05720000  |
| 34 | C | -3.08230000 | 1.43130000  | 3.39860000  |
| 35 | C | -3.48070000 | 0.16140000  | 3.67640000  |
| 36 | O | -0.45520000 | -2.96190000 | 7.07680000  |
| 37 | O | -3.75640000 | 2.21640000  | 2.48850000  |
| 38 | C | -0.38850000 | -4.32200000 | 6.72220000  |
| 39 | C | -3.27420000 | 3.51660000  | 2.24290000  |
| 40 | C | -4.07010000 | -1.84570000 | 1.14100000  |
| 41 | C | -4.64010000 | -0.65940000 | 1.47280000  |
| 42 | C | -5.06400000 | 0.17740000  | 0.48860000  |
| 43 | C | -4.77990000 | -0.04480000 | -0.81560000 |
| 44 | C | -4.20950000 | -1.22090000 | -1.11960000 |

|    |   |             |             |             |
|----|---|-------------|-------------|-------------|
| 1  | C | -3.91270000 | -2.11180000 | -0.16840000 |
| 2  | C | -5.80700000 | 1.27010000  | 0.73620000  |
| 3  | C | -6.19030000 | 2.10940000  | -0.23250000 |
| 4  | C | -5.80880000 | 1.95030000  | -1.51040000 |
| 5  | C | -5.06520000 | 0.85270000  | -1.79080000 |
| 6  | O | -3.71050000 | -2.73640000 | 2.12580000  |
| 7  | O | -6.12330000 | 2.84070000  | -2.51110000 |
| 8  | C | -3.50030000 | -4.09100000 | 1.81000000  |
| 9  | C | -6.81990000 | 4.01910000  | -2.20480000 |
| 10 | C | 3.88610000  | -2.18290000 | 3.40730000  |
| 11 | C | 4.07960000  | -0.83830000 | 3.38190000  |
| 12 | C | 3.34700000  | -0.06480000 | 4.22800000  |
| 13 | C | 2.34480000  | -0.53860000 | 5.00590000  |
| 14 | C | 2.13120000  | -1.86030000 | 4.93780000  |
| 15 | C | 2.90560000  | -2.65600000 | 4.19560000  |
| 16 | C | 3.59780000  | 1.24600000  | 4.36040000  |
| 17 | C | 2.93060000  | 2.02130000  | 5.21980000  |
| 18 | C | 1.93830000  | 1.54820000  | 5.99310000  |
| 19 | C | 1.59980000  | 0.24240000  | 5.83150000  |
| 20 | O | 4.66820000  | -3.04330000 | 2.67230000  |
| 21 | O | 1.23870000  | 2.36920000  | 6.85100000  |
| 22 | C | 5.04880000  | -4.26550000 | 3.25040000  |
| 23 | C | 1.16220000  | 3.74020000  | 6.54890000  |
| 24 | C | 1.71360000  | 1.23870000  | -2.68030000 |
| 25 | C | 5.16240000  | -0.24110000 | 2.44590000  |
| 26 | C | -4.76610000 | -0.33850000 | 2.97470000  |
| 27 | C | -4.59370000 | 0.66820000  | -3.23910000 |
| 28 | C | 0.42990000  | -0.31980000 | 6.66400000  |
| 29 | C | 0.86830000  | -4.94000000 | 7.33620000  |
| 30 | C | 1.05820000  | -6.39670000 | 6.88400000  |
| 31 | C | 2.33120000  | -7.01550000 | 7.47590000  |
| 32 | C | -4.06160000 | 4.20250000  | 1.12940000  |
| 33 | C | -3.50050000 | 5.60510000  | 0.83750000  |
| 34 | C | -4.19950000 | 6.27230000  | -0.35340000 |
| 35 | C | -3.12730000 | -4.84340000 | 3.08760000  |
| 36 | C | -2.73840000 | -6.30510000 | 2.82080000  |
| 37 | C | -2.27430000 | -7.00560000 | 4.10550000  |
| 38 | C | -6.88660000 | 4.88780000  | -3.46130000 |
| 39 | C | -7.58810000 | 6.22790000  | -3.18990000 |
| 40 | C | -7.65010000 | 7.10400000  | -4.44790000 |
| 41 | C | -4.81470000 | -2.79910000 | -6.54640000 |
| 42 | C | -4.56560000 | -3.81760000 | -7.67020000 |
| 43 | C | -5.86750000 | -4.48160000 | -8.13750000 |
| 44 | C | 1.65840000  | 4.58060000  | 0.91560000  |

|    |   |             |             |             |
|----|---|-------------|-------------|-------------|
| 1  | C | 1.19250000  | 5.47350000  | 2.07950000  |
| 2  | C | 2.32790000  | 5.78860000  | 3.06140000  |
| 3  | C | 0.89900000  | -3.14370000 | -4.27350000 |
| 4  | C | 1.21870000  | -4.52580000 | -4.86330000 |
| 5  | C | 0.22940000  | -4.90020000 | -5.97590000 |
| 6  | C | 6.50110000  | 4.10810000  | 3.80160000  |
| 7  | C | 6.32300000  | 5.56550000  | 4.25580000  |
| 8  | C | 7.01830000  | 5.83360000  | 5.59690000  |
| 9  | C | 6.16730000  | -4.87490000 | 2.40420000  |
| 10 | C | 6.60140000  | -6.24950000 | 2.93640000  |
| 11 | C | 7.72180000  | -6.86170000 | 2.08560000  |
| 12 | C | 0.02890000  | 4.36430000  | 7.36350000  |
| 13 | C | -0.13580000 | 5.85920000  | 7.04640000  |
| 14 | C | -1.27430000 | 6.49140000  | 7.85740000  |
| 15 | H | 0.47780000  | -0.22020000 | -4.48790000 |
| 16 | H | -1.19300000 | -1.40450000 | -5.51900000 |
| 17 | H | -3.40240000 | 2.55110000  | -1.99610000 |
| 18 | H | -1.75600000 | 3.69680000  | -0.89460000 |
| 19 | H | -3.05160000 | -1.58570000 | -6.92240000 |
| 20 | H | -2.82780000 | -2.93990000 | -5.70080000 |
| 21 | H | -0.28560000 | 3.71400000  | 0.71980000  |
| 22 | H | 0.06380000  | 5.04880000  | -0.48540000 |
| 23 | H | 4.16130000  | -1.86740000 | 0.86260000  |
| 24 | H | 2.82470000  | -2.78650000 | -0.74130000 |
| 25 | H | 3.31590000  | 2.93910000  | -1.41310000 |
| 26 | H | 4.78470000  | 3.76040000  | 0.14240000  |
| 27 | H | 1.91950000  | -3.58170000 | -2.44250000 |
| 28 | H | 2.87800000  | -2.53500000 | -3.58710000 |
| 29 | H | 6.26480000  | 4.45790000  | 1.66830000  |
| 30 | H | 4.71810000  | 4.09860000  | 2.57820000  |
| 31 | H | -4.02850000 | -2.32050000 | 4.54670000  |
| 32 | H | -2.73300000 | -3.59990000 | 5.94790000  |
| 33 | H | -0.44050000 | 1.62210000  | 5.35490000  |
| 34 | H | -1.62010000 | 2.91420000  | 3.92300000  |
| 35 | H | -0.32060000 | -4.40940000 | 5.61190000  |
| 36 | H | -1.29200000 | -4.85580000 | 7.09620000  |
| 37 | H | -3.36500000 | 4.12510000  | 3.17300000  |
| 38 | H | -2.21490000 | 3.45290000  | 1.90120000  |
| 39 | H | -3.99160000 | -1.51930000 | -2.15580000 |
| 40 | H | -3.47710000 | -3.06220000 | -0.51410000 |
| 41 | H | -6.16600000 | 1.53690000  | 1.73960000  |
| 42 | H | -6.81090000 | 2.96650000  | 0.07350000  |
| 43 | H | -2.64740000 | -4.19380000 | 1.10200000  |
| 44 | H | -4.42860000 | -4.51610000 | 1.36400000  |

|    |   |             |             |             |
|----|---|-------------|-------------|-------------|
| 1  | H | -7.84980000 | 3.76330000  | -1.86410000 |
| 2  | H | -6.27180000 | 4.57790000  | -1.41360000 |
| 3  | H | 1.34970000  | -2.35720000 | 5.52130000  |
| 4  | H | 2.69040000  | -3.73510000 | 4.24190000  |
| 5  | H | 4.38700000  | 1.74540000  | 3.79600000  |
| 6  | H | 3.23930000  | 3.07770000  | 5.27200000  |
| 7  | H | 4.18530000  | -4.96810000 | 3.26260000  |
| 8  | H | 5.41180000  | -4.08450000 | 4.28850000  |
| 9  | H | 2.12540000  | 4.23650000  | 6.80930000  |
| 10 | H | 0.93450000  | 3.86910000  | 5.46420000  |
| 11 | H | 2.20800000  | 2.21210000  | -2.87510000 |
| 12 | H | 1.95170000  | 0.77140000  | -3.65750000 |
| 13 | H | 5.89810000  | 0.27390000  | 3.10190000  |
| 14 | H | 5.82620000  | -1.01180000 | 1.99660000  |
| 15 | H | -5.54490000 | 0.41430000  | 3.21040000  |
| 16 | H | -5.24940000 | -1.20510000 | 3.46810000  |
| 17 | H | -4.84830000 | 1.53120000  | -3.89500000 |
| 18 | H | -5.25230000 | -0.14330000 | -3.62380000 |
| 19 | H | 0.03820000  | 0.42470000  | 7.39360000  |
| 20 | H | 0.89920000  | -1.04380000 | 7.36690000  |
| 21 | H | 1.76390000  | -4.34700000 | 7.03220000  |
| 22 | H | 0.80050000  | -4.89340000 | 8.44910000  |
| 23 | H | 1.11830000  | -6.43790000 | 5.76970000  |
| 24 | H | 0.17260000  | -7.00240000 | 7.19200000  |
| 25 | H | 2.29830000  | -7.01350000 | 8.58930000  |
| 26 | H | 3.23730000  | -6.45110000 | 7.15680000  |
| 27 | H | 2.45490000  | -8.07130000 | 7.14150000  |
| 28 | H | -5.13550000 | 4.28350000  | 1.41950000  |
| 29 | H | -3.99560000 | 3.58650000  | 0.20300000  |
| 30 | H | -3.61560000 | 6.24810000  | 1.74260000  |
| 31 | H | -2.40760000 | 5.53870000  | 0.62030000  |
| 32 | H | -5.29000000 | 6.39200000  | -0.16140000 |
| 33 | H | -3.77870000 | 7.28550000  | -0.54790000 |
| 34 | H | -4.06930000 | 5.67120000  | -1.28250000 |
| 35 | H | -2.25750000 | -4.33510000 | 3.56550000  |
| 36 | H | -3.97840000 | -4.80640000 | 3.80810000  |
| 37 | H | -1.91260000 | -6.34400000 | 2.07020000  |
| 38 | H | -3.61090000 | -6.85020000 | 2.38830000  |
| 39 | H | -3.07270000 | -6.99210000 | 4.88210000  |
| 40 | H | -1.37350000 | -6.50770000 | 4.53200000  |
| 41 | H | -2.00880000 | -8.06950000 | 3.90760000  |
| 42 | H | -7.42910000 | 4.33640000  | -4.26600000 |
| 43 | H | -5.85110000 | 5.08360000  | -3.83050000 |
| 44 | H | -8.62430000 | 6.03880000  | -2.82050000 |

|    |   |             |             |             |
|----|---|-------------|-------------|-------------|
| 1  | H | -7.04320000 | 6.77920000  | -2.38630000 |
| 2  | H | -8.21170000 | 6.59520000  | -5.26440000 |
| 3  | H | -8.16130000 | 8.07130000  | -4.23650000 |
| 4  | H | -6.62830000 | 7.33640000  | -4.82620000 |
| 5  | H | -5.51810000 | -2.01080000 | -6.90670000 |
| 6  | H | -5.30350000 | -3.31260000 | -5.68390000 |
| 7  | H | -4.08110000 | -3.30700000 | -8.53660000 |
| 8  | H | -3.86030000 | -4.60540000 | -7.31180000 |
| 9  | H | -6.58590000 | -3.72570000 | -8.52930000 |
| 10 | H | -5.67140000 | -5.21680000 | -8.95170000 |
| 11 | H | -6.36310000 | -5.02630000 | -7.30160000 |
| 12 | H | 2.15390000  | 3.68000000  | 1.34430000  |
| 13 | H | 2.41750000  | 5.11620000  | 0.29840000  |
| 14 | H | 0.37380000  | 4.96400000  | 2.64360000  |
| 15 | H | 0.77300000  | 6.42400000  | 1.67200000  |
| 16 | H | 3.18060000  | 6.28560000  | 2.54510000  |
| 17 | H | 2.70590000  | 4.85880000  | 3.54380000  |
| 18 | H | 1.97840000  | 6.46480000  | 3.87540000  |
| 19 | H | -0.14130000 | -3.15650000 | -3.86810000 |
| 20 | H | 0.94790000  | -2.39240000 | -5.09580000 |
| 21 | H | 1.17470000  | -5.29860000 | -4.05880000 |
| 22 | H | 2.25750000  | -4.52690000 | -5.27180000 |
| 23 | H | 0.26310000  | -4.16220000 | -6.80980000 |
| 24 | H | -0.81580000 | -4.93220000 | -5.59110000 |
| 25 | H | 0.46560000  | -5.90300000 | -6.40030000 |
| 26 | H | 7.58740000  | 3.87360000  | 3.70020000  |
| 27 | H | 6.08650000  | 3.43110000  | 4.58650000  |
| 28 | H | 6.73750000  | 6.25230000  | 3.47970000  |
| 29 | H | 5.23520000  | 5.79550000  | 4.35760000  |
| 30 | H | 8.11290000  | 5.63910000  | 5.52770000  |
| 31 | H | 6.88110000  | 6.89340000  | 5.91320000  |
| 32 | H | 6.60320000  | 5.18380000  | 6.40100000  |
| 33 | H | 5.81920000  | -4.98150000 | 1.34920000  |
| 34 | H | 7.04400000  | -4.18410000 | 2.39550000  |
| 35 | H | 5.72550000  | -6.94180000 | 2.94170000  |
| 36 | H | 6.95250000  | -6.14770000 | 3.99120000  |
| 37 | H | 8.62430000  | -6.20860000 | 2.07970000  |
| 38 | H | 7.39290000  | -7.00340000 | 1.03060000  |
| 39 | H | 8.02640000  | -7.85750000 | 2.48240000  |
| 40 | H | 0.23650000  | 4.23110000  | 8.45200000  |
| 41 | H | -0.92680000 | 3.83260000  | 7.13760000  |
| 42 | H | 0.81740000  | 6.39580000  | 7.26930000  |
| 43 | H | -0.34380000 | 5.99010000  | 5.95720000  |
| 44 | H | -1.08530000 | 6.40250000  | 8.95170000  |

|    |   |             |             |             |
|----|---|-------------|-------------|-------------|
| 1  | H | -1.38130000 | 7.57470000  | 7.61880000  |
| 2  | H | -2.24780000 | 5.99750000  | 7.63510000  |
| 3  | C | 0.45500000  | -0.22450000 | 2.17100000  |
| 4  | C | -0.12430000 | -0.57910000 | 0.79720000  |
| 5  | C | 0.84170000  | 1.25400000  | 2.28230000  |
| 6  | C | -0.43610000 | -2.07420000 | 0.62270000  |
| 7  | C | 0.24510000  | -3.07890000 | 1.53870000  |
| 8  | O | 1.13230000  | -3.79600000 | 0.81180000  |
| 9  | C | 1.57020000  | -5.02730000 | 1.31300000  |
| 10 | C | 2.66420000  | -5.56640000 | 0.39820000  |
| 11 | O | -0.02540000 | -3.26630000 | 2.70420000  |
| 12 | N | -0.19980000 | -2.39910000 | -0.83560000 |
| 13 | C | -1.38940000 | 0.23460000  | 0.49550000  |
| 14 | H | -0.27730000 | -0.49630000 | 2.96180000  |
| 15 | H | 1.37350000  | -0.83350000 | 2.33730000  |
| 16 | H | 0.64110000  | -0.27160000 | 0.05250000  |
| 17 | H | -0.02070000 | 1.93770000  | 2.15060000  |
| 18 | H | 1.24720000  | 1.49930000  | 3.28310000  |
| 19 | H | 1.61630000  | 1.51320000  | 1.52850000  |
| 20 | H | -1.51570000 | -2.23010000 | 0.81980000  |
| 21 | H | 1.97380000  | -4.89630000 | 2.34120000  |
| 22 | H | 0.70320000  | -5.72710000 | 1.34180000  |
| 23 | H | 2.28830000  | -5.69750000 | -0.64250000 |
| 24 | H | 3.53450000  | -4.87210000 | 0.36340000  |
| 25 | H | 3.03480000  | -6.55350000 | 0.75840000  |
| 26 | H | -0.43970000 | -1.56750000 | -1.42160000 |
| 27 | H | 0.79880000  | -2.67450000 | -0.95330000 |
| 28 | H | -0.80670000 | -3.20440000 | -1.10960000 |
| 29 | H | -1.81270000 | -0.03940000 | -0.49480000 |
| 30 | H | -2.15910000 | 0.05140000  | 1.27140000  |
| 31 | H | -1.21370000 | 1.32780000  | 0.48680000  |



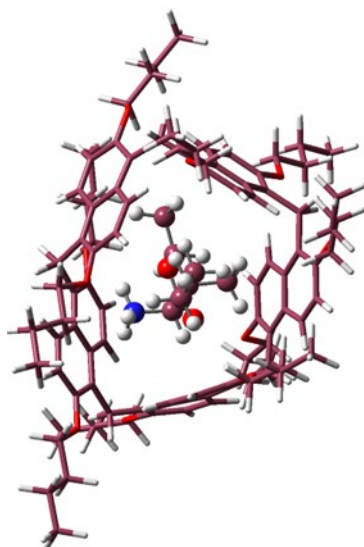

1

2 **Fig. S70** Calculated structure of complex *L-Ile@S-N4* at B3LYP/6-31G(d) level.

3

4 The atomic coordinates of *L-Ile@S-N4*

|    |   |             |             |             |
|----|---|-------------|-------------|-------------|
| 5  | C | 2.58260000  | -6.01480000 | 1.17650000  |
| 6  | C | 2.77880000  | -5.26090000 | 0.06740000  |
| 7  | C | 1.75410000  | -5.03320000 | -0.79090000 |
| 8  | C | 0.47930000  | -5.41050000 | -0.53720000 |
| 9  | C | 0.33420000  | -6.20880000 | 0.53300000  |
| 10 | C | 1.34390000  | -6.49860000 | 1.36100000  |
| 11 | C | 1.97800000  | -4.43310000 | -1.96870000 |
| 12 | C | 0.97550000  | -4.17990000 | -2.81450000 |
| 13 | C | -0.31280000 | -4.40160000 | -2.49530000 |
| 14 | C | -0.56840000 | -5.02860000 | -1.31770000 |
| 15 | O | 3.62580000  | -6.25790000 | 2.04080000  |
| 16 | O | -1.34380000 | -4.04000000 | -3.32930000 |
| 17 | C | 3.39110000  | -6.92770000 | 3.25150000  |
| 18 | C | -1.07600000 | -3.64650000 | -4.65210000 |
| 19 | C | -2.54530000 | -3.97100000 | 1.16930000  |
| 20 | C | -2.71890000 | -4.05560000 | -0.17430000 |
| 21 | C | -3.52140000 | -3.12560000 | -0.76750000 |
| 22 | C | -4.02810000 | -2.04620000 | -0.11770000 |
| 23 | C | -3.71220000 | -1.94530000 | 1.18030000  |
| 24 | C | -3.00100000 | -2.88260000 | 1.80600000  |
| 25 | C | -3.91090000 | -3.23760000 | -2.04770000 |
| 26 | C | -4.71170000 | -2.33930000 | -2.63000000 |
| 27 | C | -5.19470000 | -1.26460000 | -1.98460000 |
| 28 | C | -4.82340000 | -1.10210000 | -0.68980000 |
| 29 | O | -1.80670000 | -4.85270000 | 1.91320000  |
| 30 | O | -6.00910000 | -0.35690000 | -2.62390000 |
| 31 | C | -2.59590000 | -5.75420000 | 2.65430000  |

|    |   |             |             |             |
|----|---|-------------|-------------|-------------|
| 1  | C | -5.76550000 | -0.10990000 | -3.98760000 |
| 2  | C | 0.11390000  | 4.66790000  | 2.46580000  |
| 3  | C | -0.10950000 | 4.42070000  | 1.15170000  |
| 4  | C | 0.83880000  | 3.73770000  | 0.45680000  |
| 5  | C | 1.93420000  | 3.14820000  | 1.00040000  |
| 6  | C | 2.10730000  | 3.41150000  | 2.30600000  |
| 7  | C | 1.23500000  | 4.15180000  | 3.00100000  |
| 8  | C | 0.72080000  | 3.63670000  | -0.87180000 |
| 9  | C | 1.60130000  | 2.97100000  | -1.61190000 |
| 10 | C | 2.64930000  | 2.34510000  | -1.06270000 |
| 11 | C | 2.79390000  | 2.36590000  | 0.28520000  |
| 12 | O | -0.78800000 | 5.37850000  | 3.22520000  |
| 13 | O | 3.37970000  | 1.57910000  | -1.92360000 |
| 14 | C | -0.93470000 | 5.01620000  | 4.57620000  |
| 15 | C | 4.43360000  | 2.19900000  | -2.61090000 |
| 16 | C | 3.07710000  | -0.35130000 | 2.22220000  |
| 17 | C | 3.75780000  | 0.02780000  | 1.11040000  |
| 18 | C | 4.25510000  | -0.93890000 | 0.28830000  |
| 19 | C | 4.01240000  | -2.26230000 | 0.45910000  |
| 20 | C | 3.32660000  | -2.59360000 | 1.56290000  |
| 21 | C | 2.89960000  | -1.66820000 | 2.42600000  |
| 22 | C | 5.06960000  | -0.65290000 | -0.74070000 |
| 23 | C | 5.53960000  | -1.58470000 | -1.57690000 |
| 24 | C | 5.23110000  | -2.88520000 | -1.45160000 |
| 25 | C | 4.45450000  | -3.22470000 | -0.39290000 |
| 26 | O | 2.63990000  | 0.59320000  | 3.11950000  |
| 27 | O | 5.70140000  | -3.85670000 | -2.30700000 |
| 28 | C | 2.22330000  | 0.20410000  | 4.40570000  |
| 29 | C | 6.54220000  | -3.50750000 | -3.37520000 |
| 30 | C | -4.59790000 | 1.31410000  | 2.10440000  |
| 31 | C | -4.55480000 | 1.17710000  | 0.75290000  |
| 32 | C | -3.83940000 | 2.07310000  | 0.02350000  |
| 33 | C | -3.07050000 | 3.04500000  | 0.56680000  |
| 34 | C | -3.09100000 | 3.10680000  | 1.90700000  |
| 35 | C | -3.84290000 | 2.28540000  | 2.64680000  |
| 36 | C | -3.90340000 | 2.07330000  | -1.31480000 |
| 37 | C | -3.31750000 | 3.02070000  | -2.05230000 |
| 38 | C | -2.54700000 | 3.98090000  | -1.51290000 |
| 39 | C | -2.35910000 | 3.94220000  | -0.16700000 |
| 40 | O | -5.40770000 | 0.49520000  | 2.86120000  |
| 41 | O | -1.98200000 | 4.97770000  | -2.27860000 |
| 42 | C | -5.53840000 | 0.70890000  | 4.24180000  |
| 43 | C | -2.45630000 | 5.21620000  | -3.57850000 |
| 44 | C | -2.04980000 | -5.24180000 | -0.91850000 |

|    |   |             |             |             |
|----|---|-------------|-------------|-------------|
| 1  | C | -5.42830000 | 0.08220000  | 0.10140000  |
| 2  | C | 3.96000000  | 1.55070000  | 0.89500000  |
| 3  | C | 4.19470000  | -4.72790000 | -0.18370000 |
| 4  | C | -1.39970000 | 4.96870000  | 0.48490000  |
| 5  | C | -2.24940000 | 5.58730000  | 5.10850000  |
| 6  | C | -2.50230000 | 5.15810000  | 6.56270000  |
| 7  | C | -3.82860000 | 5.71280000  | 7.09820000  |
| 8  | C | 4.78570000  | 1.34440000  | -3.82770000 |
| 9  | C | 6.07600000  | 1.81230000  | -4.51550000 |
| 10 | C | 6.43850000  | 0.91450000  | -5.70610000 |
| 11 | C | 1.85610000  | 1.44670000  | 5.21750000  |
| 12 | C | 1.38110000  | 1.10470000  | 6.63780000  |
| 13 | C | 0.93940000  | 2.36250000  | 7.39930000  |
| 14 | C | 6.85690000  | -4.76960000 | -4.17990000 |
| 15 | C | 7.74600000  | -4.46310000 | -5.39550000 |
| 16 | C | 8.05140000  | -5.72570000 | -6.21210000 |
| 17 | C | 4.69000000  | -6.93980000 | 4.05910000  |
| 18 | C | 4.51270000  | -7.64010000 | 5.41550000  |
| 19 | C | 5.81330000  | -7.64440000 | 6.22960000  |
| 20 | C | -2.38900000 | -3.25360000 | -5.32980000 |
| 21 | C | -2.18140000 | -2.75070000 | -6.76620000 |
| 22 | C | -3.50090000 | -2.27270000 | -7.38820000 |
| 23 | C | -1.71610000 | -6.54820000 | 3.61850000  |
| 24 | C | -2.54550000 | -7.44260000 | 4.55320000  |
| 25 | C | -1.65160000 | -8.25700000 | 5.49820000  |
| 26 | C | -6.39030000 | 1.23180000  | -4.37320000 |
| 27 | C | -6.05240000 | 1.61670000  | -5.82230000 |
| 28 | C | -6.64020000 | 2.98260000  | -6.20020000 |
| 29 | C | -6.52040000 | -0.32360000 | 4.79850000  |
| 30 | C | -6.71770000 | -0.16560000 | 6.31430000  |
| 31 | C | -7.70250000 | -1.20160000 | 6.87200000  |
| 32 | C | -1.76140000 | 6.46360000  | -4.12660000 |
| 33 | C | -2.20200000 | 6.77620000  | -5.56530000 |
| 34 | C | -1.50070000 | 8.02410000  | -6.11790000 |
| 35 | H | -0.61910000 | -6.69500000 | 0.77390000  |
| 36 | H | 1.11850000  | -7.15770000 | 2.21310000  |
| 37 | H | 2.98530000  | -4.14570000 | -2.30220000 |
| 38 | H | 1.26410000  | -3.70890000 | -3.76720000 |
| 39 | H | 3.07490000  | -7.97570000 | 3.04140000  |
| 40 | H | 2.60810000  | -6.38320000 | 3.82960000  |
| 41 | H | -0.41960000 | -2.74710000 | -4.65440000 |
| 42 | H | -0.59460000 | -4.48990000 | -5.19850000 |
| 43 | H | -4.03400000 | -1.11060000 | 1.80420000  |
| 44 | H | -2.78800000 | -2.75330000 | 2.88200000  |

|    |   |             |             |             |
|----|---|-------------|-------------|-------------|
| 1  | H | -3.63750000 | -4.08990000 | -2.68140000 |
| 2  | H | -4.99960000 | -2.53130000 | -3.67620000 |
| 3  | H | -3.35230000 | -5.18500000 | 3.24260000  |
| 4  | H | -3.12940000 | -6.43620000 | 1.95320000  |
| 5  | H | -6.21310000 | -0.92160000 | -4.60580000 |
| 6  | H | -4.66470000 | -0.05560000 | -4.16070000 |
| 7  | H | 2.98060000  | 3.05820000  | 2.87010000  |
| 8  | H | 1.47430000  | 4.32940000  | 4.06200000  |
| 9  | H | -0.08260000 | 4.10460000  | -1.43340000 |
| 10 | H | 1.44280000  | 2.91630000  | -2.70280000 |
| 11 | H | -0.96570000 | 3.90380000  | 4.65560000  |
| 12 | H | -0.08620000 | 5.42460000  | 5.17160000  |
| 13 | H | 5.29540000  | 2.32680000  | -1.92200000 |
| 14 | H | 4.11120000  | 3.20920000  | -2.95310000 |
| 15 | H | 3.11450000  | -3.63440000 | 1.83540000  |
| 16 | H | 2.37530000  | -2.04660000 | 3.31750000  |
| 17 | H | 5.42480000  | 0.36220000  | -0.94470000 |
| 18 | H | 6.20990000  | -1.23720000 | -2.37860000 |
| 19 | H | 1.31700000  | -0.43900000 | 4.33390000  |
| 20 | H | 3.05440000  | -0.34030000 | 4.91100000  |
| 21 | H | 7.48820000  | -3.07240000 | -2.97740000 |
| 22 | H | 6.01640000  | -2.78030000 | -4.03750000 |
| 23 | H | -2.52930000 | 3.86560000  | 2.46010000  |
| 24 | H | -3.81870000 | 2.45430000  | 3.73520000  |
| 25 | H | -4.49670000 | 1.33760000  | -1.86310000 |
| 26 | H | -3.49370000 | 2.96900000  | -3.13850000 |
| 27 | H | -4.54800000 | 0.56930000  | 4.73480000  |
| 28 | H | -5.93480000 | 1.73500000  | 4.42290000  |
| 29 | H | -3.55830000 | 5.38110000  | -3.54670000 |
| 30 | H | -2.20380000 | 4.35240000  | -4.23600000 |
| 31 | H | -2.61920000 | -5.56830000 | -1.81160000 |
| 32 | H | -2.20090000 | -6.15960000 | -0.31560000 |
| 33 | H | -6.19880000 | 0.63420000  | -0.48210000 |
| 34 | H | -6.08960000 | -0.41570000 | 0.84670000  |
| 35 | H | 4.86360000  | 1.78310000  | 0.29770000  |
| 36 | H | 4.32040000  | 1.97790000  | 1.85290000  |
| 37 | H | 4.56400000  | -5.36370000 | -1.01970000 |
| 38 | H | 4.90610000  | -4.98820000 | 0.63270000  |
| 39 | H | -1.05620000 | 5.74640000  | -0.23350000 |
| 40 | H | -2.01410000 | 5.59460000  | 1.16850000  |
| 41 | H | -3.09620000 | 5.23470000  | 4.47240000  |
| 42 | H | -2.22490000 | 6.70100000  | 5.04230000  |
| 43 | H | -2.52050000 | 4.04350000  | 6.62590000  |
| 44 | H | -1.66440000 | 5.51380000  | 7.20880000  |

|    |   |             |             |             |
|----|---|-------------|-------------|-------------|
| 1  | H | -3.99780000 | 5.39510000  | 8.15290000  |
| 2  | H | -3.83710000 | 6.82650000  | 7.07380000  |
| 3  | H | -4.68980000 | 5.34840000  | 6.49260000  |
| 4  | H | 4.90170000  | 0.28050000  | -3.52140000 |
| 5  | H | 3.93900000  | 1.37200000  | -4.55470000 |
| 6  | H | 6.91610000  | 1.79820000  | -3.78030000 |
| 7  | H | 5.95270000  | 2.86550000  | -4.86390000 |
| 8  | H | 6.59930000  | -0.13910000 | -5.38050000 |
| 9  | H | 7.37510000  | 1.26310000  | -6.19910000 |
| 10 | H | 5.63000000  | 0.91780000  | -6.47230000 |
| 11 | H | 1.03160000  | 1.99040000  | 4.70120000  |
| 12 | H | 2.73440000  | 2.13270000  | 5.27390000  |
| 13 | H | 0.52410000  | 0.39110000  | 6.58520000  |
| 14 | H | 2.20430000  | 0.59860000  | 7.19610000  |
| 15 | H | 1.77440000  | 3.09500000  | 7.48370000  |
| 16 | H | 0.09110000  | 2.86910000  | 6.88430000  |
| 17 | H | 0.60430000  | 2.10830000  | 8.43120000  |
| 18 | H | 7.36780000  | -5.51230000 | -3.52160000 |
| 19 | H | 5.90310000  | -5.23400000 | -4.52800000 |
| 20 | H | 8.70440000  | -4.00560000 | -5.05160000 |
| 21 | H | 7.23800000  | -3.71650000 | -6.05200000 |
| 22 | H | 8.58520000  | -6.48410000 | -5.59490000 |
| 23 | H | 8.69590000  | -5.48800000 | -7.08970000 |
| 24 | H | 7.11530000  | -6.19190000 | -6.59610000 |
| 25 | H | 5.48650000  | -7.45840000 | 3.47360000  |
| 26 | H | 5.03100000  | -5.88990000 | 4.22710000  |
| 27 | H | 4.17700000  | -8.69210000 | 5.25200000  |
| 28 | H | 3.71510000  | -7.12360000 | 6.00160000  |
| 29 | H | 6.62600000  | -8.17770000 | 5.68550000  |
| 30 | H | 5.66970000  | -8.15480000 | 7.20980000  |
| 31 | H | 6.16130000  | -6.60650000 | 6.43610000  |
| 32 | H | -2.86710000 | -2.43360000 | -4.74490000 |
| 33 | H | -3.08910000 | -4.12250000 | -5.33020000 |
| 34 | H | -1.45300000 | -1.90430000 | -6.76610000 |
| 35 | H | -1.74580000 | -3.56760000 | -7.38940000 |
| 36 | H | -4.25010000 | -3.09630000 | -7.42170000 |
| 37 | H | -3.94130000 | -1.43240000 | -6.80320000 |
| 38 | H | -3.34400000 | -1.91310000 | -8.43120000 |
| 39 | H | -1.10010000 | -5.84460000 | 4.22780000  |
| 40 | H | -1.01640000 | -7.19380000 | 3.04100000  |
| 41 | H | -3.24050000 | -6.81190000 | 5.15750000  |
| 42 | H | -3.17060000 | -8.13970000 | 3.94520000  |
| 43 | H | -0.96310000 | -8.92140000 | 4.92740000  |
| 44 | H | -1.03110000 | -7.58930000 | 6.13880000  |

|    |   |             |             |             |
|----|---|-------------|-------------|-------------|
| 1  | H | -2.26330000 | -8.90080000 | 6.17130000  |
| 2  | H | -7.49720000 | 1.17870000  | -4.24280000 |
| 3  | H | -6.01470000 | 2.03110000  | -3.69090000 |
| 4  | H | -6.44540000 | 0.83680000  | -6.51750000 |
| 5  | H | -4.94370000 | 1.65020000  | -5.95200000 |
| 6  | H | -7.74990000 | 2.98290000  | -6.10260000 |
| 7  | H | -6.39170000 | 3.24700000  | -7.25380000 |
| 8  | H | -6.23630000 | 3.78830000  | -5.54500000 |
| 9  | H | -6.14150000 | -1.35060000 | 4.57870000  |
| 10 | H | -7.50450000 | -0.21490000 | 4.28290000  |
| 11 | H | -5.73530000 | -0.27630000 | 6.83290000  |
| 12 | H | -7.09780000 | 0.86020000  | 6.53670000  |
| 13 | H | -8.70440000 | -1.10090000 | 6.39540000  |
| 14 | H | -7.33890000 | -2.23910000 | 6.69210000  |
| 15 | H | -7.83600000 | -1.07500000 | 7.97110000  |
| 16 | H | -1.99080000 | 7.33600000  | -3.46910000 |
| 17 | H | -0.65560000 | 6.31060000  | -4.10330000 |
| 18 | H | -3.30710000 | 6.93210000  | -5.59220000 |
| 19 | H | -1.97280000 | 5.90480000  | -6.22450000 |
| 20 | H | -1.82900000 | 8.23810000  | -7.16110000 |
| 21 | H | -0.39480000 | 7.89050000  | -6.13150000 |
| 22 | H | -1.73110000 | 8.92140000  | -5.49920000 |
| 23 | C | 0.23040000  | 0.42150000  | -3.90380000 |
| 24 | C | -0.25430000 | 0.14240000  | -2.46540000 |
| 25 | C | -0.54260000 | 1.54050000  | -4.61800000 |
| 26 | C | 0.60540000  | -0.92570000 | -1.75830000 |
| 27 | C | 0.13230000  | -1.29880000 | -0.36650000 |
| 28 | O | 0.07270000  | -0.18380000 | 0.39950000  |
| 29 | C | -0.41990000 | -0.35120000 | 1.70020000  |
| 30 | C | -0.60670000 | 1.01030000  | 2.34100000  |
| 31 | O | -0.12440000 | -2.41740000 | 0.01040000  |
| 32 | N | 2.02350000  | -0.44300000 | -1.66170000 |
| 33 | C | -1.72340000 | -0.31410000 | -2.45680000 |
| 34 | H | 1.30580000  | 0.71570000  | -3.88550000 |
| 35 | H | 0.16690000  | -0.51100000 | -4.51110000 |
| 36 | H | -0.19930000 | 1.09560000  | -1.88740000 |
| 37 | H | -1.58370000 | 1.23850000  | -4.86920000 |
| 38 | H | -0.59110000 | 2.46080000  | -3.99320000 |
| 39 | H | -0.04900000 | 1.81190000  | -5.57950000 |
| 40 | H | 0.60900000  | -1.83430000 | -2.39230000 |
| 41 | H | -1.41810000 | -0.83620000 | 1.64220000  |
| 42 | H | 0.26720000  | -0.99300000 | 2.29130000  |
| 43 | H | 0.36160000  | 1.51330000  | 2.51730000  |
| 44 | H | -1.17330000 | 1.66700000  | 1.65170000  |

|   |   |             |             |             |
|---|---|-------------|-------------|-------------|
| 1 | H | -1.14410000 | 0.94580000  | 3.31450000  |
| 2 | H | 2.63020000  | -1.23830000 | -1.36110000 |
| 3 | H | 2.06830000  | 0.31440000  | -0.94580000 |
| 4 | H | 2.34660000  | -0.09990000 | -2.59280000 |
| 5 | H | -2.11020000 | -0.42220000 | -1.41970000 |
| 6 | H | -1.83880000 | -1.29390000 | -2.96730000 |
| 7 | H | -2.39570000 | 0.40710000  | -2.96620000 |
| 8 |   |             |             |             |

**Table S3** Computed energies.

| Energy<br>(Hartree/Particle) | G            |
|------------------------------|--------------|
| free R-N1+free L-Ile         | -3786.389112 |
| free S-N1+free L-Ile         | -3786.389112 |
| free R-N4+free L-Ile         | -4966.021962 |
| free S-N4+free L-Ile         | -4966.021962 |
| L-Ile@R-N1                   | -3786.451264 |
| L-Ile@S-N1                   | -3786.440000 |
| L-Ile@R-N4                   | -4966.079923 |
| L-Ile@S-N4                   | -4966.095142 |

9

**Table S4** Computed free energies for host-guest complexes.

| Complexes  | $\Delta G$ (kcal mol <sup>-1</sup> ) |
|------------|--------------------------------------|
| L-Ile@R-N1 | -39.00                               |
| L-Ile@S-N1 | -31.93                               |
| L-Ile@R-N4 | -36.37                               |
| L-Ile@S-N4 | -45.92                               |

10

## 11 Reference

- 12 1 (a) P. Della Sala, R. Del Regno, C. Talotta, A. Capobianco, N. Hickey, S. Geremia, M. De Rosa, A. Spinella, A.  
13 Soriente, P. Neri and C. Gaeta, *J Am Chem Soc*, 2020, **142**, 1752-1756; (b) P. Della Sala, R. Del Regno, L. Di  
14 Marino, C. Calabrese, C. Palo, C. Talotta, S. Geremia, N. Hickey, A. Capobianco, P. Neri and C. Gaeta, *Chem*  
15 *Sci*, 2021, **12**, 9952-9961.
- 16 2 J. Ji, Y. Li, C. Xiao, G. Cheng, K. Luo, Q. Gong, D. Zhou, J. J. Chruma, W. Wu and C. Yang, *Chem Commun*  
17 *(Camb)*, 2020, **56**, 161-164.

18
